# Supplementary material for: Multi-omics insights into host-viral response and pathogenesis in Crimean-Congo hemorrhagic fever viruses for novel therapeutic target
Source: eLife journal article supplement (doi:10.7554/elife.76071), 2022-03-15
Supplement: fig5-data1 [file Densitometry_CCHFV_WB_ISGs.xlsx]

## Sheet:  ISG
Replicate 1
	Actin	IFIT1	RIG-I	ISG20	TRIM25	ISG15	MX1	MX2			IFIT1	RIG-I	ISG20	TRIM25	ISG15	MX1	MX2			IFIT1	RIG-I	ISG20	TRIM25	ISG15	MX1	MX2
24h Mock	14655.3	7112.62	7052.23	14280.7	14149.6	8991.52	14470.8	7514.28		24h Mock	0.485327	0.481206	0.974435	0.96549	0.613532	0.987411	0.512733		24h Mock	1	1	1	1	1	1	1
24h CCHFV	14486	7812.01	9429.65	12672.8	13200.4	7712.1	12738.6	12352.5		24h CCHFV	0.539279	0.650948	0.874832	0.911253	0.532382	0.879371	0.852718		24h CCHFV	1.11117	1.35274	0.897783	0.943825	0.867733	0.890582	1.66308
24h UV	14816.4	6598.11	9056.48	12524.6	11832.9	6855.33	14302.4	19072.4		24h UV	0.445324	0.611245	0.845317	0.798634	0.462684	0.965308	1.28724		24h UV	0.917575	1.27023	0.867494	0.82718	0.754131	0.977615	2.51055
48h Mock	14197.2	5116.99	7547.11	14467.6	10518.9	6983.15	15834.3	18271.7		48h Mock	0.360424	0.531593	1.01905	0.740917	0.49187	1.11531	1.287		48h Mock	1	1	1	1	1	1	1
48h CCHFV	13247.7	10722	9799.35	16153.1	10307.5	9798.69	18522.4	13127.6		48h CCHFV	0.809346	0.7397	1.21931	0.778057	0.73965	1.39815	0.990933		48h CCHFV	2.24554	1.39148	1.19652	1.05013	1.50375	1.25359	0.769957
48h UV	12733.6	4984.99	7573.53	14208.8	10054.9	7995.28	17655	11568.4		48h UV	0.391484	0.594769	1.11585	0.789638	0.62789	1.3865	0.908494		48h UV	1.08618	1.11884	1.09499	1.06576	1.27654	1.24314	0.705903
Replicate 2
	Actin	IFIT1	RIG-I	ISG20	TRIM25	ISG15	MX1	MX2			IFIT1	RIG-I	ISG20	TRIM25	ISG15	MX1	MX2			IFIT1	RIG-I	ISG20	TRIM25	ISG15	MX1	MX2
24h Mock	12116	5642.23	11731.3	15534.4	10362.2	7498.57	14730.4	16829.4		24h Mock	0.465683	0.968246	1.28213	0.855247	0.618896	1.21578	1.38902		24h Mock	1	1	1	1	1	1	1
24h CCHFV	13432.2	6093.82	11021	15285.2	12057.6	6093.57	16209.8	15381.5		24h CCHFV	0.453674	0.820495	1.13796	0.897668	0.453655	1.20679	1.14513		24h CCHFV	0.974212	0.847403	0.887549	1.0496	0.733007	0.992604	0.824411
24h UV	12889.4	5564.11	9417.18	11434.2	12103.4	6197.86	12981.2	11900.8		24h UV	0.43168	0.730612	0.887097	0.93902	0.480848	1.00712	0.923297		24h UV	0.926981	0.754572	0.691891	1.09795	0.776944	0.828372	0.66471
48h Mock	14087.3	6158.06	8858.48	9548.77	10976.3	6484.74	12368.8	11078.8		48h Mock	0.437136	0.628828	0.677829	0.779166	0.460326	0.878011	0.786439		48h Mock	1	1	1	1	1	1	1
48h CCHFV	15405.3	15601.2	12420.4	13976	9024.67	10697.5	31282.4	28437		48h CCHFV	1.01271	0.806245	0.907222	0.585817	0.694406	2.03063	1.84593		48h CCHFV	2.3167	1.28214	1.33842	0.751851	1.50851	2.31276	2.3472
48h UV	15032.7	4219.77	5656.6	9692.77	10841	6057.08	13761.7	11477.4		48h UV	0.280705	0.376285	0.644777	0.721158	0.402926	0.915448	0.763495		48h UV	0.642146	0.598391	0.951238	0.925551	0.875306	1.04264	0.970825
Replicate 3
	Actin	IFIT1	RIG-I	ISG20	TRIM25	ISG15	MX1	MX2			IFIT1	RIG-I	ISG20	TRIM25	ISG15	MX1	MX2			IFIT1	RIG-I	ISG20	TRIM25	ISG15	MX1	MX2
24h Mock	20614.2	7558.32	14237.4	11935.2	38541.1	8724.54	7812.29	4450.76		24h Mock	0.366656	0.690657	0.578979	1.86964	0.423229	0.378976	0.215907		24h Mock	1	1	1	1	1	1	1
24h CCHFV	21419.3	6876.2	15596.2	13849.3	37261	8490.66	7915.36	3566.57		24h CCHFV	0.321029	0.728141	0.646584	1.7396	0.396403	0.369544	0.166512		24h CCHFV	0.875559	1.05427	1.11676	0.930448	0.936615	0.975112	0.771221
24h UV	22566.1	6828.39	12308	14508.3	29868	9591.2	6778.38	2699.4		24h UV	0.302594	0.545419	0.642922	1.32358	0.425026	0.300378	0.119622		24h UV	0.825282	0.789709	1.11044	0.707931	1.00425	0.792606	0.554041
48h Mock	25220.1	6209.36	12933.9	16986	21436.2	8083.83	7464.68	2876.22		48h Mock	0.246207	0.512839	0.673512	0.849965	0.320531	0.295981	0.114045		48h Mock	1	1	1	1	1	1	1
48h CCHFV	24231.3	10266.1	16448.1	14656.9	24647.4	11256.4	9220.7	6231.02		48h CCHFV	0.423671	0.678796	0.604873	1.01717	0.464538	0.380528	0.257148		48h CCHFV	1.72079	1.3236	0.898089	1.19672	1.44928	1.28565	2.25479
48h UV	27182.4	5002.95	11701.2	11862.4	22234.6	6970	8856.85	5352.83		48h UV	0.184051	0.430469	0.436399	0.817977	0.256416	0.325831	0.196923		48h UV	0.747548	0.839383	0.647946	0.962366	0.799973	1.10085	1.72671
