# Supplementary material for: Multi-omics insights into host-viral response and pathogenesis in Crimean-Congo hemorrhagic fever viruses for novel therapeutic target
Source: eLife. 2022 Apr 19;11:e76071. doi: 10.7554/eLife.76071 (PMC9018070; doi:10.7554/eLife.76071)
Supplement: Supplementary file 2. [file elife-76071-supp2.xlsx]

## Sheet: PianoResults
Name	Genes (tot)	Stat (dist.dir.up)	p (dist.dir.up)	p adj (dist.dir.up)	Stat (dist.dir.dn)	p (dist.dir.dn)	p adj (dist.dir.dn)	Stat (non-dir.)	p (non-dir.)	p adj (non-dir.)	Genes (up)	Stat (mix.dir.up)	p (mix.dir.up)	p adj (mix.dir.up)	Genes (down)	Stat (mix.dir.dn)	p (mix.dir.dn)	p adj (mix.dir.dn)
Amino sugar and nucleotide sugar metabolism	48	0.32707	0.001996	0.029341	0.67293	1	1	0.21733	0.025948	0.14127	33	0.17925	0.13573	0.57006	15	0.3011	0.31537	0.61812
Citrate cycle (TCA cycle)	28	0.14979	0.001996	0.029341	0.85021	1	1	0.11776	0.001996	0.036677	23	0.036637	0.001996	0.073353	5	0.4909	0.8483	0.98568
Cysteine and methionine metabolism	41	0.3181	0.001996	0.029341	0.6819	1	1	0.32053	0.6507	0.82459	27	0.20789	0.30539	0.743	14	0.53778	0.97605	1
Fatty acid degradation	37	0.27494	0.001996	0.029341	0.72506	1	1	0.21596	0.0499	0.20376	28	0.18458	0.17365	0.57532	9	0.31359	0.39321	0.68003
N-Glycan biosynthesis	49	0.22384	0.001996	0.029341	0.77616	1	1	0.12278	0.001996	0.036677	36	0.027115	0.001996	0.073353	13	0.3877	0.65868	0.91523
Oxidative phosphorylation	111	0.25395	0.001996	0.029341	0.74605	1	1	0.22171	0.003992	0.053348	81	0.12955	0.001996	0.073353	30	0.47054	0.97405	1
Porphyrin and chlorophyll metabolism	30	0.27913	0.001996	0.029341	0.72087	1	1	0.34315	0.72056	0.88268	19	0.13269	0.077844	0.48204	11	0.70667	1	1
Pyruvate metabolism	37	0.33503	0.001996	0.029341	0.66497	1	1	0.2071	0.031936	0.15144	24	0.13447	0.041916	0.43034	13	0.34117	0.47106	0.75267
Thermogenesis	204	0.3603	0.001996	0.029341	0.6397	1	1	0.2143	0.001996	0.036677	128	0.15125	0.001996	0.073353	76	0.3205	0.28942	0.61812
Valine, leucine and isoleucine degradation	46	0.18264	0.001996	0.029341	0.81736	1	1	0.19408	0.007984	0.078244	40	0.17163	0.091816	0.48204	6	0.3437	0.45709	0.74657
Biosynthesis of unsaturated fatty acids	26	0.34547	0.003992	0.032601	0.65453	0.998	1	0.19835	0.077844	0.2791	18	0.19781	0.33733	0.77393	8	0.19955	0.11776	0.37557
Glycine, serine and threonine metabolism	37	0.35589	0.003992	0.032601	0.64411	0.998	1	0.22423	0.075848	0.27874	24	0.17984	0.15369	0.57532	13	0.30617	0.36128	0.67225
Glyoxylate and dicarboxylate metabolism	26	0.31774	0.003992	0.032601	0.68226	0.998	1	0.17697	0.037924	0.16893	18	0.14232	0.1018	0.4988	8	0.25492	0.21357	0.56063
NOD-like receptor signaling pathway	152	0.44708	0.003992	0.032601	0.55292	0.998	1	0.27775	0.17565	0.41646	82	0.2325	0.47505	0.80267	70	0.33075	0.30739	0.61812
One carbon pool by folate	17	0.31156	0.003992	0.032601	0.68844	0.998	1	0.050774	0.003992	0.053348	12	0.06067	0.011976	0.2515	5	0.027023	0.007984	0.055888
Propanoate metabolism	31	0.28757	0.003992	0.032601	0.71243	0.998	1	0.20076	0.033932	0.15588	22	0.13757	0.05988	0.46108	9	0.35523	0.54291	0.82277
Synthesis and degradation of ketone bodies	9	0.19687	0.003992	0.032601	0.80313	0.998	1	0.24548	0.36527	0.6273	7	0.12522	0.16367	0.57532	2	0.66641	0.89222	1
Tryptophan metabolism	39	0.35256	0.003992	0.032601	0.64744	0.998	1	0.28815	0.41717	0.65238	27	0.27292	0.73054	0.94489	12	0.32242	0.38323	0.68003
Alanine, aspartate and glutamate metabolism	33	0.38627	0.005988	0.041916	0.61373	0.99601	1	0.27148	0.32335	0.56587	19	0.1698	0.18363	0.57532	14	0.40947	0.75848	0.98568
Glycolysis / Gluconeogenesis	60	0.40949	0.005988	0.041916	0.59051	0.99601	1	0.29639	0.42914	0.66404	31	0.14391	0.035928	0.40626	29	0.45938	0.96208	1
Terpenoid backbone biosynthesis	21	0.29755	0.005988	0.041916	0.70245	0.99601	1	0.18458	0.057884	0.22392	13	0.014355	0.003992	0.11737	8	0.4612	0.84232	0.98568
Fatty acid biosynthesis	13	0.23768	0.007984	0.053348	0.76232	0.99401	1	0.11312	0.01996	0.12757	10	0.082516	0.057884	0.46108	3	0.21515	0.28144	0.61812
Pyrimidine metabolism	55	0.39507	0.00998	0.063785	0.60493	0.99202	1	0.22358	0.027944	0.14165	32	0.15242	0.05988	0.46108	23	0.32259	0.34531	0.65078
Arginine and proline metabolism	46	0.39624	0.013972	0.082156	0.60376	0.98802	1	0.29292	0.41317	0.65238	26	0.19092	0.1996	0.57532	20	0.42551	0.81238	0.98568
Glutathione metabolism	46	0.39944	0.013972	0.082156	0.60056	0.98802	1	0.26895	0.24351	0.4812	25	0.14241	0.063872	0.46108	21	0.41959	0.82635	0.98568
Ubiquinone and other terpenoid-quinone biosynthesis	11	0.30099	0.017964	0.10157	0.69901	0.98403	1	0.30204	0.50299	0.74792	8	0.24651	0.54691	0.82036	3	0.4501	0.69661	0.93092
Lysine degradation	52	0.4292	0.01996	0.10867	0.5708	0.98204	1	0.21983	0.027944	0.14165	31	0.2269	0.42715	0.80224	21	0.20938	0.02994	0.15177
Ascorbate and aldarate metabolism	15	0.33954	0.025948	0.13153	0.66046	0.97605	1	0.36645	0.81038	0.938	8	0.10519	0.08982	0.48204	7	0.66504	0.998	1
Butanoate metabolism	22	0.3527	0.025948	0.13153	0.6473	0.97605	1	0.2405	0.21357	0.45872	14	0.17178	0.19162	0.57532	8	0.36075	0.57086	0.84764
Steroid biosynthesis	19	0.34328	0.035928	0.17037	0.65672	0.96607	1	0.16122	0.021956	0.1291	13	0.15799	0.1996	0.57532	6	0.16822	0.061876	0.23323
beta-Alanine metabolism	29	0.39926	0.035928	0.17037	0.60074	0.96607	1	0.22896	0.13772	0.36548	16	0.11867	0.071856	0.48013	13	0.36471	0.57685	0.84796
Glycosylphosphatidylinositol (GPI)-anchor biosynthesis	24	0.39755	0.0499	0.21574	0.60245	0.9521	1	0.22622	0.14172	0.36548	13	0.0966	0.02994	0.40011	11	0.37941	0.63074	0.91188
PPAR signaling pathway	63	0.45112	0.0499	0.21574	0.54888	0.9521	1	0.309	0.51896	0.74792	32	0.22356	0.3992	0.80224	31	0.39718	0.79242	0.98568
RIG-I-like receptor signaling pathway	57	0.44365	0.047904	0.21574	0.55635	0.95409	1	0.25523	0.13972	0.36548	29	0.15731	0.091816	0.48204	28	0.35666	0.53493	0.81911
Cytosolic DNA-sensing pathway	49	0.44338	0.057884	0.22997	0.55662	0.94411	1	0.22985	0.091816	0.30645	25	0.13428	0.043912	0.43034	24	0.3294	0.39122	0.68003
Phenylalanine metabolism	16	0.37009	0.057884	0.22997	0.62991	0.94411	1	0.43469	0.9501	1	9	0.26656	0.65669	0.91315	7	0.65086	0.99601	1
Riboflavin metabolism	8	0.28881	0.055888	0.22997	0.71119	0.94611	1	0.15984	0.11776	0.36548	6	0.15831	0.30339	0.743	2	0.16445	0.29142	0.61812
Galactose metabolism	30	0.42807	0.073852	0.27837	0.57193	0.92814	1	0.23114	0.13373	0.36548	15	0.087269	0.02994	0.40011	15	0.37501	0.63273	0.91188
Tyrosine metabolism	28	0.42643	0.073852	0.27837	0.57357	0.92814	1	0.39845	0.9521	1	15	0.30122	0.8004	0.97239	13	0.51065	0.96806	1
Phenylalanine, tyrosine and tryptophan biosynthesis	5	0.26561	0.083832	0.30808	0.73439	0.91816	1	0.2716	0.41118	0.65238	3	0.0023539	0.047904	0.44012	2	0.67548	0.9022	1
Vitamin B6 metabolism	6	0.30763	0.08982	0.32204	0.69237	0.91218	1	0.29975	0.50699	0.74792	4	0.18626	0.41118	0.80224	2	0.52674	0.81437	0.98568
Arginine biosynthesis	20	0.40712	0.10379	0.36327	0.59288	0.8982	1	0.26409	0.30339	0.53733	11	0.16212	0.21756	0.60343	9	0.38873	0.66267	0.91523
Fructose and mannose metabolism	33	0.4489	0.10778	0.36847	0.5511	0.89421	1	0.2507	0.21956	0.45872	17	0.17355	0.17565	0.57532	16	0.33268	0.46906	0.75267
Nicotinate and nicotinamide metabolism	27	0.44018	0.12375	0.40426	0.55982	0.87824	1	0.27583	0.37126	0.6273	15	0.24057	0.53094	0.82036	12	0.3199	0.36926	0.67852
alpha-Linolenic acid metabolism	22	0.42718	0.12375	0.40426	0.57282	0.87824	1	0.51874	1	1	9	0.23379	0.50699	0.82036	13	0.71601	1	1
Linoleic acid metabolism	24	0.44295	0.13373	0.42736	0.55705	0.86826	1	0.46517	0.98802	1	8	0.026595	0.017964	0.33009	16	0.68445	1	1
Folate biosynthesis	22	0.43726	0.14571	0.45573	0.56274	0.85629	1	0.30925	0.56687	0.75864	11	0.18377	0.31337	0.743	11	0.43474	0.79641	0.98568
Fatty acid elongation	26	0.4449	0.15369	0.47068	0.5551	0.8483	1	0.16179	0.015968	0.11178	15	0.17804	0.25749	0.6759	11	0.13963	0.015968	0.090281
Primary bile acid biosynthesis	15	0.43717	0.18962	0.55749	0.56283	0.81238	1	0.38576	0.86427	0.96983	8	0.30634	0.71058	0.94489	7	0.47652	0.8523	0.98568
Progesterone-mediated oocyte maturation	90	0.49275	0.18762	0.55749	0.50725	0.81437	1	0.23775	0.023952	0.13542	40	0.12617	0.011976	0.2515	50	0.32702	0.2994	0.61812
Sulfur metabolism	8	0.40268	0.20758	0.59833	0.59732	0.79441	1	0.21736	0.2495	0.48259	4	0.022713	0.087824	0.48204	4	0.412	0.67265	0.91523
Pentose and glucuronate interconversions	22	0.45399	0.21756	0.61504	0.54601	0.78443	1	0.39107	0.92016	0.99458	9	0.14329	0.17166	0.57532	13	0.56261	0.98802	1
Other glycan degradation	16	0.46202	0.2475	0.67376	0.53798	0.75449	1	0.17537	0.063872	0.24075	10	0.27953	0.73054	0.94489	6	0.001774	0.001996	0.036677
Selenocompound metabolism	15	0.45937	0.2475	0.67376	0.54063	0.75449	1	0.063555	0.001996	0.036677	8	0.0459	0.027944	0.40011	7	0.083732	0.013972	0.082156
Purine metabolism	121	0.50643	0.25948	0.69352	0.49357	0.74251	1	0.28369	0.26946	0.49513	54	0.21188	0.30938	0.743	67	0.34156	0.42315	0.70686
ECM-receptor interaction	80	0.50069	0.27545	0.72305	0.49931	0.72655	1	0.30779	0.5489	0.7541	37	0.25315	0.6507	0.91315	43	0.3548	0.56287	0.84431
Steroid hormone biosynthesis	40	0.49393	0.28343	0.73096	0.50607	0.71856	1	0.43183	0.99601	1	15	0.22624	0.45509	0.80267	25	0.55518	1	1
Glycerolipid metabolism	46	0.50517	0.31337	0.78575	0.49483	0.68862	1	0.27582	0.28343	0.51438	22	0.25372	0.59481	0.86571	24	0.29608	0.23752	0.59645
Mucin type O-glycan biosynthesis	27	0.49298	0.31537	0.78575	0.50702	0.68663	1	0.33581	0.74251	0.8874	14	0.346	0.90818	0.97455	13	0.32485	0.42315	0.70686
AMPK signaling pathway	113	0.51583	0.34531	0.83214	0.48417	0.65669	1	0.26231	0.10778	0.34444	51	0.21783	0.36327	0.77393	62	0.29891	0.085828	0.30739
Pentose phosphate pathway	29	0.49575	0.34331	0.83214	0.50425	0.65868	1	0.34801	0.78044	0.9178	14	0.31592	0.84232	0.9729	15	0.37796	0.64671	0.91523
Ether lipid metabolism	40	0.50515	0.35329	0.83765	0.49485	0.6487	1	0.30207	0.46108	0.70603	16	0.14045	0.11178	0.53004	24	0.40981	0.83633	0.98568
Thiamine metabolism	13	0.49537	0.36727	0.85695	0.50463	0.63473	1	0.19661	0.11976	0.36548	7	0.2454	0.56287	0.83578	6	0.13969	0.043912	0.18443
Glycosaminoglycan degradation	18	0.50524	0.42914	0.98568	0.49476	0.57285	1	0.22931	0.18363	0.42848	9	0.2398	0.54691	0.82036	9	0.21882	0.12176	0.37557
Aldosterone synthesis and secretion	86	0.63687	1	1	0.36313	0.001996	0.014671	0.32483	0.72854	0.88505	26	0.33611	0.92814	0.97455	60	0.31995	0.23952	0.59645
Calcium signaling pathway	164	0.64288	1	1	0.35712	0.001996	0.014671	0.33008	0.88224	0.9751	43	0.26741	0.74052	0.94489	121	0.35236	0.51497	0.79685
Cell adhesion molecules (CAMs)	130	0.66095	1	1	0.33905	0.001996	0.014671	0.25471	0.041916	0.17605	37	0.25621	0.66467	0.91315	93	0.25411	0.003992	0.04514
Circadian entrainment	89	0.69923	1	1	0.30077	0.001996	0.014671	0.33685	0.82834	0.9513	17	0.30711	0.84032	0.9729	72	0.34387	0.48703	0.76982
Cytokine-cytokine receptor interaction	250	0.62777	1	1	0.37223	0.001996	0.014671	0.30963	0.67066	0.83548	72	0.2451	0.60878	0.87736	178	0.33574	0.33333	0.63636
ErbB signaling pathway	81	0.63531	1	1	0.36469	0.001996	0.014671	0.26352	0.14172	0.36548	27	0.3012	0.85629	0.9729	54	0.24468	0.007984	0.055888
Hematopoietic cell lineage	93	0.7496	1	1	0.2504	0.001996	0.014671	0.22604	0.015968	0.11178	18	0.29019	0.79641	0.97239	75	0.21065	0.001996	0.036677
Leukocyte transendothelial migration	105	0.65579	1	1	0.34421	0.001996	0.014671	0.30766	0.57285	0.75864	29	0.31068	0.91617	0.97455	76	0.3065	0.15569	0.43469
MAPK signaling pathway	274	0.64393	1	1	0.35607	0.001996	0.014671	0.28762	0.25749	0.48526	81	0.28198	0.91218	0.97455	193	0.28998	0.007984	0.055888
Neuroactive ligand-receptor interaction	249	0.63363	1	1	0.36637	0.001996	0.014671	0.47425	1	1	51	0.36897	1	1	198	0.50136	1	1
Notch signaling pathway	47	0.70322	1	1	0.29678	0.001996	0.014671	0.28514	0.40519	0.65238	11	0.34113	0.87226	0.9729	36	0.26804	0.05988	0.23164
Oxytocin signaling pathway	140	0.63791	1	1	0.36209	0.001996	0.014671	0.33802	0.91417	0.99458	37	0.26944	0.75848	0.94489	103	0.36265	0.67066	0.91523
Parathyroid hormone synthesis, secretion and action	99	0.705	1	1	0.295	0.001996	0.014671	0.27557	0.21357	0.45872	26	0.40138	0.99601	1	73	0.23076	0.001996	0.036677
Rap1 signaling pathway	189	0.63594	1	1	0.36406	0.001996	0.014671	0.30123	0.54691	0.7541	58	0.30444	0.92615	0.97455	131	0.2998	0.03992	0.17783
Ras signaling pathway	208	0.61479	1	1	0.38521	0.001996	0.014671	0.28294	0.21557	0.45872	68	0.25445	0.71058	0.94489	140	0.29677	0.037924	0.17421
Sphingolipid signaling pathway	117	0.6496	1	1	0.3504	0.001996	0.014671	0.27145	0.16966	0.41567	37	0.32117	0.9501	0.98355	80	0.24846	0.007984	0.055888
T cell receptor signaling pathway	98	0.66163	1	1	0.33837	0.001996	0.014671	0.21691	0.005988	0.067711	31	0.27318	0.75649	0.94489	67	0.19087	0.001996	0.036677
Th1 and Th2 cell differentiation	89	0.74667	1	1	0.25333	0.001996	0.014671	0.18416	0.003992	0.053348	20	0.28241	0.74251	0.94489	69	0.15568	0.001996	0.036677
Th17 cell differentiation	102	0.7515	1	1	0.2485	0.001996	0.014671	0.15882	0.001996	0.036677	22	0.21602	0.35529	0.77393	80	0.14309	0.001996	0.036677
cAMP signaling pathway	181	0.62008	1	1	0.37992	0.001996	0.014671	0.35372	0.98403	1	52	0.29321	0.88024	0.9729	129	0.37812	0.85629	0.98568
NF-kappa B signaling pathway	92	0.64299	0.998	1	0.35701	0.003992	0.024451	0.22955	0.00998	0.086298	29	0.23153	0.51896	0.82036	63	0.22864	0.003992	0.04514
Natural killer cell mediated cytotoxicity	109	0.62106	0.998	1	0.37894	0.003992	0.024451	0.20838	0.001996	0.036677	36	0.16812	0.085828	0.48204	73	0.22824	0.001996	0.036677
Phospholipase D signaling pathway	136	0.63115	0.998	1	0.36885	0.003992	0.024451	0.27315	0.17565	0.41646	41	0.22953	0.47305	0.80267	95	0.29198	0.0499	0.20376
Wnt signaling pathway	144	0.61469	0.998	1	0.38531	0.003992	0.024451	0.30011	0.48902	0.7411	49	0.30865	0.94212	0.98221	95	0.29571	0.067864	0.2494
Platelet activation	117	0.61401	0.99601	1	0.38599	0.005988	0.033855	0.31015	0.61477	0.80689	38	0.28903	0.84431	0.9729	79	0.3203	0.2475	0.59645
Regulation of lipolysis in adipocytes	48	0.68449	0.99601	1	0.31551	0.005988	0.033855	0.26242	0.20758	0.45872	11	0.19577	0.35928	0.77393	37	0.28223	0.11577	0.37557
Chemokine signaling pathway	177	0.59611	0.99401	1	0.40389	0.007984	0.041916	0.25202	0.021956	0.1291	64	0.23149	0.43114	0.80224	113	0.26365	0.003992	0.04514
Renin secretion	58	0.66547	0.99401	1	0.33453	0.007984	0.041916	0.34601	0.8483	0.95924	14	0.33082	0.87425	0.9729	44	0.35084	0.50699	0.79284
FoxO signaling pathway	124	0.60554	0.99202	1	0.39446	0.00998	0.048902	0.2357	0.005988	0.067711	42	0.18334	0.13174	0.56957	82	0.26251	0.011976	0.076543
Phosphatidylinositol signaling system	92	0.62604	0.99202	1	0.37396	0.00998	0.048902	0.23378	0.015968	0.11178	33	0.28332	0.81836	0.9729	59	0.20607	0.001996	0.036677
cGMP-PKG signaling pathway	147	0.59982	0.98603	1	0.40018	0.015968	0.07572	0.30941	0.6487	0.82459	50	0.27831	0.8483	0.9729	97	0.32544	0.25549	0.60546
TGF-beta signaling pathway	85	0.61819	0.98403	1	0.38181	0.017964	0.080022	0.28087	0.25549	0.48526	25	0.17933	0.18164	0.57532	60	0.32318	0.25948	0.60546
Thyroid hormone signaling pathway	110	0.60644	0.98403	1	0.39356	0.017964	0.080022	0.26433	0.12774	0.36548	36	0.2013	0.22954	0.62486	74	0.295	0.087824	0.30739
Circadian rhythm	29	0.67575	0.98204	1	0.32425	0.01996	0.083832	0.24503	0.2016	0.45872	9	0.34997	0.87425	0.9729	20	0.19781	0.033932	0.16627
Hippo signaling pathway	150	0.59592	0.98204	1	0.40408	0.01996	0.083832	0.26887	0.087824	0.30645	54	0.25099	0.65868	0.91315	96	0.27893	0.013972	0.082156
Melanogenesis	94	0.61546	0.98004	1	0.38454	0.021956	0.089654	0.2635	0.13373	0.36548	31	0.23347	0.47106	0.80267	63	0.27827	0.037924	0.17421
Hedgehog signaling pathway	42	0.6509	0.97605	1	0.3491	0.025948	0.10309	0.42304	0.98403	1	11	0.4747	0.98802	1	31	0.40471	0.82435	0.98568
Cortisol synthesis and secretion	53	0.62226	0.97006	1	0.37774	0.031936	0.12037	0.31929	0.63074	0.81332	14	0.17434	0.1996	0.57532	39	0.37132	0.71058	0.94104
Insulin secretion	74	0.60926	0.97006	1	0.39074	0.031936	0.12037	0.33394	0.84032	0.95757	21	0.21149	0.39521	0.80224	53	0.38246	0.78044	0.98568
Fc gamma R-mediated phagocytosis	86	0.60119	0.96806	1	0.39881	0.033932	0.1247	0.22845	0.017964	0.12003	30	0.18419	0.1517	0.57532	56	0.25215	0.017964	0.097804
HIF-1 signaling pathway	95	0.59646	0.96607	1	0.40354	0.035928	0.12882	0.26267	0.13573	0.36548	34	0.23943	0.52894	0.82036	61	0.27562	0.025948	0.13623
Antigen processing and presentation	68	0.60469	0.9501	1	0.39531	0.051896	0.17741	0.1841	0.001996	0.036677	25	0.17512	0.16966	0.57532	43	0.18932	0.003992	0.04514
Fc epsilon RI signaling pathway	66	0.60687	0.9501	1	0.39313	0.051896	0.17741	0.28699	0.37924	0.63351	21	0.21544	0.41717	0.80224	45	0.32038	0.32136	0.62157
GnRH signaling pathway	85	0.58969	0.94611	1	0.41031	0.055888	0.18257	0.27952	0.23952	0.4812	30	0.23344	0.49102	0.81101	55	0.30465	0.15968	0.43469
Relaxin signaling pathway	125	0.58407	0.94611	1	0.41593	0.055888	0.18257	0.30472	0.56487	0.75864	43	0.23382	0.45509	0.80267	82	0.3419	0.41717	0.70686
Glycerophospholipid metabolism	83	0.58464	0.92415	1	0.41536	0.077844	0.24876	0.30614	0.56886	0.75864	30	0.27433	0.75649	0.94489	53	0.32414	0.29541	0.61812
Metabolism of xenobiotics by cytochrome P450	48	0.60409	0.90818	1	0.39591	0.093812	0.29341	0.3771	0.93613	1	12	0.17055	0.27545	0.69812	36	0.44594	0.96208	1
VEGF signaling pathway	57	0.59172	0.90619	1	0.40828	0.095808	0.29341	0.25984	0.16367	0.40779	20	0.20669	0.35928	0.77393	37	0.28858	0.15968	0.43469
Prolactin signaling pathway	64	0.58581	0.9022	1	0.41419	0.0998	0.2994	0.26909	0.21756	0.45872	22	0.18649	0.21357	0.60343	42	0.31236	0.26747	0.61433
Apelin signaling pathway	126	0.57101	0.89222	1	0.42899	0.10978	0.32275	0.26386	0.093812	0.30645	51	0.26609	0.75449	0.94489	75	0.26235	0.007984	0.055888
Inositol phosphate metabolism	73	0.59083	0.88623	1	0.40917	0.11577	0.33369	0.21245	0.013972	0.11178	27	0.18093	0.14371	0.57532	46	0.23095	0.005988	0.055888
Intestinal immune network for IgA production	45	0.58949	0.87824	1	0.41051	0.12375	0.34984	0.17269	0.001996	0.036677	18	0.18959	0.26946	0.69493	27	0.16142	0.003992	0.04514
Starch and sucrose metabolism	32	0.60165	0.87226	1	0.39835	0.12974	0.35985	0.2781	0.37126	0.6273	11	0.24567	0.57086	0.83916	21	0.29508	0.24351	0.59645
Neomycin, kanamycin and gentamicin biosynthesis	5	0.71835	0.86627	1	0.28165	0.13573	0.36948	0.20069	0.26547	0.49397	1	0.093506	0.54092	0.82036	4	0.22749	0.2475	0.59645
PI3K-Akt signaling pathway	318	0.54949	0.82834	1	0.45051	0.17365	0.46413	0.28822	0.23353	0.4768	128	0.23877	0.53293	0.82036	190	0.32153	0.12575	0.37557
Longevity regulating pathway	96	0.56624	0.81038	1	0.43376	0.19162	0.50299	0.27557	0.24551	0.4812	35	0.18818	0.1996	0.57532	61	0.32571	0.31138	0.61812
Estrogen signaling pathway	114	0.55758	0.8004	1	0.44242	0.2016	0.51991	0.32155	0.73453	0.88505	41	0.21689	0.3493	0.77393	73	0.38033	0.7984	0.98568
Insulin signaling pathway	129	0.55566	0.77844	1	0.44434	0.22355	0.56659	0.30521	0.52894	0.7517	55	0.31575	0.98004	1	74	0.29738	0.11178	0.37343
Glucagon signaling pathway	91	0.56023	0.77445	1	0.43977	0.22754	0.56693	0.29905	0.50898	0.74792	34	0.22316	0.42515	0.80224	57	0.34432	0.4511	0.74507
Ovarian steroidogenesis	39	0.57013	0.7485	1	0.42987	0.25349	0.62106	0.29969	0.51697	0.74792	12	0.089925	0.033932	0.40626	27	0.39291	0.7505	0.98503
Arachidonic acid metabolism	51	0.55738	0.69261	1	0.44262	0.30938	0.72189	0.32198	0.66068	0.83008	17	0.1551	0.11577	0.53181	34	0.40542	0.85828	0.98568
Sphingolipid metabolism	42	0.56403	0.69461	1	0.43597	0.30739	0.72189	0.18522	0.00998	0.086298	18	0.19882	0.33932	0.77393	24	0.17501	0.007984	0.055888
TNF signaling pathway	109	0.54863	0.69461	1	0.45137	0.30739	0.72189	0.2459	0.031936	0.15144	47	0.23836	0.53094	0.82036	62	0.25162	0.011976	0.076543
Histidine metabolism	21	0.56883	0.67864	1	0.43117	0.32335	0.7427	0.33094	0.62874	0.81332	9	0.38003	0.91218	0.97455	12	0.29412	0.28942	0.61812
Phosphonate and phosphinate metabolism	5	0.60141	0.65669	1	0.39859	0.34531	0.78093	0.43875	0.80639	0.938	3	0.7013	0.99401	1	2	0.044926	0.1497	0.43149
Pantothenate and CoA biosynthesis	19	0.56252	0.63872	1	0.43748	0.36327	0.80911	0.35759	0.77844	0.9178	6	0.18081	0.37325	0.78383	13	0.43918	0.8523	0.98568
C-type lectin receptor signaling pathway	101	0.54204	0.63273	1	0.45796	0.36926	0.81017	0.2344	0.007984	0.078244	41	0.16056	0.065868	0.46108	60	0.28485	0.05988	0.23164
B cell receptor signaling pathway	69	0.54136	0.59281	1	0.45864	0.40918	0.86347	0.22845	0.03992	0.1726	31	0.2334	0.47106	0.80267	38	0.22442	0.005988	0.055888
Nitrogen metabolism	16	0.55461	0.59082	1	0.44539	0.41118	0.86347	0.45508	0.97605	1	5	0.3029	0.70858	0.94489	11	0.52426	0.9501	1
mTOR signaling pathway	146	0.53651	0.5988	1	0.46349	0.40319	0.86347	0.27933	0.22156	0.45872	65	0.27264	0.83433	0.9729	81	0.2847	0.041916	0.18123
Adipocytokine signaling pathway	63	0.54014	0.57285	1	0.45986	0.42914	0.86416	0.28145	0.30339	0.53733	27	0.25535	0.63673	0.90873	36	0.30102	0.18962	0.5068
Complement and coagulation cascades	69	0.53913	0.58283	1	0.46087	0.41916	0.86416	0.30477	0.53693	0.7517	30	0.29049	0.81637	0.9729	39	0.31576	0.30339	0.61812
Taurine and hypotaurine metabolism	9	0.56357	0.57485	1	0.43643	0.42715	0.86416	0.34348	0.68263	0.84325	3	0.20593	0.47305	0.80267	6	0.41226	0.6507	0.91523
Caffeine metabolism	5	0.55359	0.55289	1	0.44641	0.4491	0.89213	0.49282	0.87226	0.97138	1	4.6289e-08	0.0998	0.4988	4	0.61602	0.93613	1
Renin-angiotensin system	19	0.53442	0.53892	1	0.46558	0.46307	0.89568	0.27909	0.39122	0.64617	8	0.22567	0.46108	0.80267	11	0.31794	0.38922	0.68003
Toll-like receptor signaling pathway	89	0.53646	0.54291	1	0.46354	0.45908	0.89568	0.26276	0.13573	0.36548	38	0.22204	0.42315	0.80224	51	0.2931	0.12774	0.37557
Retinol metabolism	40	0.53171	0.53094	1	0.46829	0.47106	0.89929	0.47335	1	1	14	0.33824	0.89022	0.97455	26	0.5461	1	1
ABC transporters	41	0.52705	0.50699	1	0.47295	0.49501	0.9329	0.30352	0.53293	0.7517	16	0.17695	0.25349	0.6759	25	0.38453	0.67864	0.91523
D-Glutamine and D-glutamate metabolism	4	0.5156	0.48104	1	0.4844	0.52096	0.94387	0.061123	0.08982	0.30645	2	0.092331	0.40918	0.80224	2	0.029916	0.12575	0.37557
IL-17 signaling pathway	83	0.52416	0.49102	1	0.47584	0.51098	0.94387	0.29046	0.41118	0.65238	36	0.23777	0.48104	0.80355	47	0.33082	0.37924	0.68003
Mannose type O-glycan biosynthesis	20	0.52696	0.47305	1	0.47304	0.52894	0.94387	0.41282	0.92016	0.99458	8	0.33341	0.7984	0.97239	12	0.46576	0.89621	1
Other types of O-glycan biosynthesis	22	0.51761	0.46906	1	0.48239	0.53293	0.94387	0.18915	0.051896	0.20618	10	0.1468	0.1996	0.57532	12	0.22444	0.093812	0.32071
Thyroid hormone synthesis	64	0.52224	0.47705	1	0.47776	0.52495	0.94387	0.25993	0.15569	0.39459	27	0.17559	0.12176	0.54237	37	0.32148	0.30339	0.61812
