# Supplementary material for: Multi-omics insights into host-viral response and pathogenesis in Crimean-Congo hemorrhagic fever viruses for novel therapeutic target
Source: eLife. 2022 Apr 19;11:e76071. doi: 10.7554/eLife.76071 (PMC9018070; doi:10.7554/eLife.76071)
Supplement: Supplementary file 3. [file elife-76071-supp3.xlsx]

## Sheet: 24hpi
Name	Genes (tot)	Stat (dist.dir.up)	p (dist.dir.up)	p adj (dist.dir.up)	Stat (dist.dir.dn)	p (dist.dir.dn)	p adj (dist.dir.dn)	Stat (non-dir.)	p (non-dir.)	p adj (non-dir.)	Genes (up)	Stat (mix.dir.up)	p (mix.dir.up)	p adj (mix.dir.up)	Genes (down)	Stat (mix.dir.dn)	p (mix.dir.dn)	p adj (mix.dir.dn)
ABC transporters	25	0.1876	0.001996	0.024451	0.8124	1	1	0.056039	0.17166	0.55689	21	0.066208	0.2994	0.71444	4	0.0026483	0.12375	0.39681
AMPK signaling pathway	81	0.65225	0.998	1	0.34775	0.003992	0.023473	0.057921	0.037924	0.27874	28	0.077791	0.34731	0.7164	53	0.047424	0.027944	0.1466
Adipocytokine signaling pathway	40	0.69069	1	1	0.30931	0.001996	0.014671	0.020345	0.001996	0.058683	12	0.0028705	0.007984	0.24979	28	0.027834	0.021956	0.14172
Alanine, aspartate and glutamate metabolism	24	0.45236	0.37325	0.97962	0.54764	0.62874	0.98721	0.080998	0.3513	0.66582	14	0.13062	0.7505	0.95281	10	0.01153	0.083832	0.30524
Aldosterone synthesis and secretion	42	0.25831	0.003992	0.036677	0.74169	0.998	1	0.089418	0.42914	0.69184	31	0.055699	0.17565	0.55803	11	0.18445	0.89222	1
Amino sugar and nucleotide sugar metabolism	39	0.68576	0.99601	1	0.31424	0.005988	0.030353	0.1007	0.58882	0.72737	11	0.064404	0.37325	0.74005	28	0.11496	0.66667	0.96599
Antigen processing and presentation	32	0.4415	0.31138	0.91545	0.5585	0.69062	1	0.074635	0.29142	0.64907	18	0.073461	0.34331	0.7164	14	0.076145	0.34132	0.71275
Apelin signaling pathway	72	0.46865	0.4511	1	0.53135	0.5509	0.95273	0.085348	0.31537	0.64942	38	0.074078	0.25749	0.65952	34	0.097943	0.52096	0.8503
Arachidonic acid metabolism	15	0.45415	0.41118	0.97962	0.54585	0.59082	0.97478	0.10872	0.62475	0.75277	9	0.18084	0.87824	0.96359	6	0.0005283	0.027944	0.1466
Arginine and proline metabolism	31	0.44951	0.36327	0.97627	0.55049	0.63872	0.98721	0.06729	0.22954	0.6135	17	0.057518	0.22954	0.65299	14	0.079156	0.36327	0.73693
Arginine biosynthesis	15	0.57017	0.77046	1	0.42983	0.23154	0.53181	0.098158	0.56287	0.72737	7	0.1841	0.85828	0.96359	8	0.022963	0.1996	0.52488
Ascorbate and aldarate metabolism	10	0.26956	0.087824	0.36886	0.73044	0.91417	1	0.072858	0.41118	0.69019	7	0.0085558	0.13972	0.52306	3	0.2229	0.81637	1
B cell receptor signaling pathway	42	0.81972	1	1	0.18028	0.001996	0.014671	0.03758	0.025948	0.22437	8	0.15217	0.82635	0.96359	34	0.010617	0.001996	0.047239
Biosynthesis of unsaturated fatty acids	21	0.37712	0.16766	0.61617	0.62288	0.83433	1	0.095044	0.54092	0.72737	13	0.070579	0.37725	0.74005	8	0.1348	0.69062	0.9695
Butanoate metabolism	20	0.46128	0.41317	0.97962	0.53872	0.58882	0.97478	0.084206	0.39321	0.68577	10	0.0067572	0.03992	0.38249	10	0.16165	0.82036	1
C-type lectin receptor signaling pathway	51	0.69711	0.998	1	0.30289	0.003992	0.023473	0.029019	0.001996	0.058683	15	0.019518	0.065868	0.41812	36	0.032978	0.015968	0.12597
Caffeine metabolism	3	0.96037	0.93014	1	0.039626	0.071856	0.22006	0.079252	0.60479	0.73475	0	NA	NA	NA	3	0.079252	0.60679	0.91663
Calcium signaling pathway	68	0.39656	0.087824	0.36886	0.60344	0.91417	1	0.086787	0.32735	0.64942	41	0.071136	0.28144	0.69454	27	0.11055	0.62076	0.92116
Cell adhesion molecules (CAMs)	40	0.27426	0.003992	0.036677	0.72574	0.998	1	0.066285	0.16367	0.55689	29	0.044691	0.091816	0.48916	11	0.12322	0.65469	0.95841
Chemokine signaling pathway	77	0.62287	0.998	1	0.37713	0.003992	0.023473	0.10135	0.58483	0.72737	28	0.10226	0.57485	0.87425	49	0.10083	0.53493	0.85348
Circadian entrainment	34	0.29898	0.001996	0.024451	0.70102	1	1	0.14222	0.86228	0.90521	24	0.10763	0.59481	0.87425	10	0.22526	0.95609	1
Circadian rhythm	16	0.58344	0.82635	1	0.41656	0.17565	0.41646	0.059699	0.26547	0.63974	7	0.11609	0.63872	0.87975	9	0.015837	0.091816	0.318
Citrate cycle (TCA cycle)	27	0.23561	0.001996	0.024451	0.76439	1	1	0.064113	0.18962	0.55749	20	0.011355	0.00998	0.24979	7	0.21485	0.91816	1
Complement and coagulation cascades	42	0.51501	0.68463	1	0.48499	0.31737	0.60588	0.076083	0.28543	0.64907	20	0.061404	0.24152	0.65299	22	0.089427	0.44711	0.76834
Cortisol synthesis and secretion	28	0.25946	0.005988	0.051779	0.74054	0.99601	1	0.075742	0.32335	0.64942	20	0.016265	0.01996	0.3238	8	0.22443	0.92016	1
Cysteine and methionine metabolism	40	0.78932	1	1	0.21068	0.001996	0.014671	0.12619	0.77445	0.85597	9	0.34405	1	1	31	0.062935	0.20559	0.53079
Cytokine-cytokine receptor interaction	39	0.22441	0.001996	0.024451	0.77559	1	1	0.07338	0.25549	0.63974	30	0.039428	0.047904	0.38344	9	0.18655	0.87625	1
Cytosolic DNA-sensing pathway	27	0.51078	0.61677	1	0.48922	0.38523	0.71682	0.079636	0.3513	0.66582	14	0.1333	0.76248	0.95967	13	0.02184	0.081836	0.30524
D-Glutamine and D-glutamate metabolism	4	0.020061	0.025948	0.14165	0.97994	0.97605	1	0.040123	0.41317	0.69019	4	0.040123	0.4511	0.81309	0	NA	NA	NA
ECM-receptor interaction	35	0.34923	0.027944	0.14165	0.65077	0.97405	1	0.103	0.54291	0.72737	23	0.088066	0.45908	0.81739	12	0.13161	0.72655	0.9695
ErbB signaling pathway	56	0.72208	0.998	1	0.27792	0.003992	0.023473	0.081646	0.32136	0.64942	16	0.17014	0.91218	0.96506	40	0.046247	0.045908	0.19173
Estrogen signaling pathway	61	0.4959	0.61078	1	0.5041	0.39122	0.71886	0.094412	0.44511	0.69184	31	0.10095	0.63273	0.87975	30	0.08766	0.44311	0.76834
Ether lipid metabolism	20	0.226	0.007984	0.061771	0.774	0.99401	1	0.076059	0.33134	0.64942	15	0.018701	0.061876	0.41063	5	0.24813	0.93214	1
Fatty acid biosynthesis	8	0.46207	0.48303	1	0.53793	0.51896	0.93033	0.076072	0.46307	0.70177	4	0.00020481	0.031936	0.35867	4	0.15194	0.71457	0.9695
Fatty acid degradation	32	0.27742	0.007984	0.061771	0.72258	0.99401	1	0.065163	0.20359	0.57554	23	0.040005	0.1018	0.50336	9	0.12946	0.7006	0.9695
Fatty acid elongation	21	0.41297	0.25549	0.79908	0.58703	0.74651	1	0.042597	0.11976	0.51779	12	0.0099777	0.0499	0.38344	9	0.08609	0.46108	0.77944
Fc epsilon RI signaling pathway	32	0.76904	1	1	0.23096	0.001996	0.014671	0.04916	0.085828	0.43539	8	0.17447	0.87026	0.96359	24	0.00739	0.001996	0.047239
Fc gamma R-mediated phagocytosis	55	0.74101	1	1	0.25899	0.001996	0.014671	0.054686	0.067864	0.39904	15	0.15064	0.83832	0.96359	40	0.018702	0.003992	0.047239
Folate biosynthesis	15	0.63623	0.90818	1	0.36377	0.093812	0.25538	0.095347	0.53293	0.72737	6	0.20976	0.8982	0.96359	9	0.019068	0.10778	0.35594
FoxO signaling pathway	73	0.66162	1	1	0.33838	0.001996	0.014671	0.0752	0.18363	0.55689	24	0.085121	0.4012	0.75096	49	0.070341	0.1517	0.44877
Fructose and mannose metabolism	25	0.84862	1	1	0.15138	0.001996	0.014671	0.085868	0.39521	0.68577	3	0.0963	0.64671	0.88242	22	0.084445	0.40519	0.75459
Galactose metabolism	18	0.63117	0.90818	1	0.36883	0.093812	0.25538	0.047984	0.17565	0.55689	7	0.11328	0.63473	0.87975	11	0.0064347	0.025948	0.1466
Glucagon signaling pathway	60	0.56066	0.90818	1	0.43934	0.093812	0.25538	0.017728	0.001996	0.058683	26	0.0066006	0.005988	0.24979	34	0.026238	0.00998	0.10123
Glutathione metabolism	38	0.63869	0.98204	1	0.36131	0.01996	0.081504	0.062613	0.18563	0.55689	14	0.10427	0.58084	0.87425	24	0.03831	0.043912	0.19173
Glycerolipid metabolism	36	0.58917	0.93812	1	0.41083	0.063872	0.20411	0.11401	0.70858	0.79961	15	0.15082	0.83832	0.96359	21	0.087716	0.4491	0.76834
Glycerophospholipid metabolism	50	0.39956	0.085828	0.36886	0.60044	0.91617	1	0.17602	0.99002	0.99002	30	0.14595	0.89022	0.96359	20	0.22113	0.97605	1
Glycine, serine and threonine metabolism	31	0.59402	0.94212	1	0.40598	0.05988	0.20005	0.10071	0.55888	0.72737	13	0.15198	0.83633	0.96359	18	0.063681	0.27944	0.61919
Glycolysis / Gluconeogenesis	39	0.66634	0.99401	1	0.33366	0.007984	0.039122	0.0012751	0.001996	0.058683	13	0.00092933	0.003992	0.24979	26	0.001448	0.001996	0.047239
Glycosaminoglycan degradation	11	0.37477	0.25549	0.79908	0.62523	0.74651	1	0.2049	0.92615	0.95821	8	0.28117	0.98802	0.99886	3	0.001491	0.17166	0.49745
Glycosylphosphatidylinositol (GPI)-anchor biosynthesis	13	0.24149	0.023952	0.14084	0.75851	0.97804	1	0.079309	0.4012	0.68577	10	0.065484	0.38523	0.74005	3	0.12539	0.69461	0.9695
Glyoxylate and dicarboxylate metabolism	25	0.53824	0.74451	1	0.46176	0.25749	0.54856	0.10373	0.56088	0.72737	12	0.14604	0.78842	0.96359	13	0.064666	0.30539	0.65705
GnRH signaling pathway	46	0.51783	0.69461	1	0.48217	0.30739	0.60588	0.081615	0.2994	0.64942	22	0.077142	0.34331	0.7164	24	0.085715	0.4012	0.75459
HIF-1 signaling pathway	59	0.66377	0.99601	1	0.33623	0.005988	0.030353	0.064087	0.12974	0.52977	20	0.10266	0.5988	0.87425	39	0.044306	0.017964	0.13426
Hedgehog signaling pathway	25	0.52764	0.68663	1	0.47236	0.31537	0.60588	0.02767	0.021956	0.20172	12	0.044741	0.20758	0.62946	13	0.011912	0.035928	0.16457
Hematopoietic cell lineage	18	0.37758	0.15968	0.60187	0.62242	0.84232	1	0.13203	0.79042	0.85867	11	0.089515	0.53094	0.86475	7	0.19885	0.88024	1
Hippo signaling pathway	71	0.51218	0.72056	1	0.48782	0.28144	0.58683	0.045978	0.007984	0.13041	35	0.057059	0.12575	0.52306	36	0.035204	0.02994	0.1466
Histidine metabolism	13	0.61594	0.83832	1	0.38406	0.16367	0.39442	0.0017809	0.003992	0.097804	5	0.0037519	0.12774	0.52306	8	0.00054901	0.015968	0.12597
IL-17 signaling pathway	45	0.67091	1	1	0.32909	0.001996	0.014671	0.10372	0.58683	0.72737	15	0.16831	0.90419	0.96359	30	0.07142	0.27545	0.61919
Inositol phosphate metabolism	49	0.60056	0.97804	1	0.39944	0.023952	0.092657	0.12164	0.79441	0.85867	21	0.20987	0.99202	0.99886	28	0.055459	0.12575	0.39681
Insulin secretion	28	0.23071	0.003992	0.036677	0.76929	0.998	1	0.087991	0.43513	0.69184	21	0.032945	0.081836	0.48916	7	0.25313	0.96008	1
Insulin signaling pathway	90	0.72764	1	1	0.27236	0.001996	0.014671	0.079772	0.20958	0.58129	23	0.09033	0.47904	0.82282	67	0.076148	0.18363	0.51781
Intestinal immune network for IgA production	5	0.35833	0.23752	0.79355	0.64167	0.76447	1	0.1016	0.57086	0.72737	3	0.01521	0.3513	0.7164	2	0.23117	0.80439	1
Leukocyte transendothelial migration	48	0.51612	0.69261	1	0.48388	0.30938	0.60588	0.057231	0.067864	0.39904	24	0.089469	0.44311	0.80868	24	0.024993	0.01996	0.14172
Linoleic acid metabolism	3	0.0021267	0.027944	0.14165	0.99787	0.97405	1	0.0042534	0.25948	0.63974	3	0.0042534	0.21557	0.62946	0	NA	NA	NA
Longevity regulating pathway	71	0.57401	0.96008	1	0.42599	0.041916	0.14329	0.086681	0.35329	0.66582	30	0.094387	0.48703	0.82681	41	0.081042	0.26747	0.61258
Lysine degradation	47	0.34813	0.017964	0.11481	0.65187	0.98403	1	0.10928	0.65868	0.76846	29	0.032066	0.041916	0.38249	18	0.23367	0.99002	1
MAPK signaling pathway	139	0.58152	0.99002	1	0.41848	0.011976	0.053348	0.085964	0.27345	0.64835	60	0.13009	0.89421	0.96359	79	0.052449	0.011976	0.11337
Mannose type O-glycan biosynthesis	11	0.11049	0.00998	0.06986	0.88951	0.99202	1	0.22098	0.9521	0.95862	11	0.22098	0.96607	0.99041	0	NA	NA	NA
Melanogenesis	35	0.46507	0.41317	0.97962	0.53493	0.58882	0.97478	0.060186	0.13373	0.53132	18	0.018379	0.045908	0.38344	17	0.10445	0.57285	0.89702
Metabolism of xenobiotics by cytochrome P450	26	0.66261	0.97206	1	0.33739	0.02994	0.11003	0.019922	0.013972	0.16766	9	0.054108	0.32735	0.7164	17	0.0018239	0.001996	0.047239
Mucin type O-glycan biosynthesis	15	0.10555	0.001996	0.024451	0.89445	1	1	0.097517	0.55489	0.72737	14	0.093901	0.50299	0.8441	1	0.14815	0.81038	1
N-Glycan biosynthesis	40	0.21399	0.001996	0.024451	0.78601	1	1	0.066081	0.15768	0.55689	32	0.058783	0.16168	0.55803	8	0.095274	0.51497	0.8503
NF-kappa B signaling pathway	42	0.64452	0.98802	1	0.35548	0.013972	0.058683	0.093326	0.46906	0.70359	15	0.13532	0.78044	0.96359	27	0.069997	0.24152	0.58128
NOD-like receptor signaling pathway	90	0.55358	0.92814	1	0.44642	0.073852	0.22156	0.067901	0.091816	0.43539	41	0.094577	0.53892	0.86475	49	0.04558	0.027944	0.1466
Natural killer cell mediated cytotoxicity	45	0.71802	1	1	0.28198	0.001996	0.014671	0.088326	0.38723	0.68577	12	0.10818	0.61078	0.87425	33	0.081108	0.32934	0.69801
Neomycin, kanamycin and gentamicin biosynthesis	2	6.6038e-05	0.027944	0.14165	0.99993	0.97405	1	0.00013208	0.12375	0.51976	2	0.00013208	0.13772	0.52306	0	NA	NA	NA
Neuroactive ligand-receptor interaction	23	0.45715	0.41317	0.97962	0.54285	0.58882	0.97478	0.10715	0.58683	0.72737	12	0.062221	0.30339	0.71444	11	0.15615	0.8004	1
Nicotinate and nicotinamide metabolism	20	0.62237	0.91018	1	0.37763	0.091816	0.25538	0.055472	0.15968	0.55689	7	0.0002966	0.011976	0.24979	13	0.085182	0.44112	0.76834
Nitrogen metabolism	9	0.41727	0.35729	0.97627	0.58273	0.64471	0.98721	0.092868	0.53293	0.72737	5	0.034675	0.38124	0.74005	4	0.16561	0.73054	0.9695
Notch signaling pathway	29	0.22871	0.001996	0.024451	0.77129	1	1	0.090113	0.44711	0.69184	22	0.042692	0.11178	0.50336	7	0.23915	0.9501	1
One carbon pool by folate	17	0.60095	0.86427	1	0.39905	0.13772	0.34812	0.049605	0.16766	0.55689	7	0.091125	0.54491	0.86475	10	0.020541	0.13174	0.40666
Other glycan degradation	14	0.30673	0.077844	0.3576	0.69327	0.92415	1	0.18648	0.94611	0.95862	10	0.15996	0.82036	0.96359	4	0.25278	0.90419	1
Other types of O-glycan biosynthesis	15	0.046268	0.001996	0.024451	0.95373	1	1	0.092536	0.50898	0.72641	15	0.092536	0.54291	0.86475	0	NA	NA	NA
Ovarian steroidogenesis	15	0.25539	0.021956	0.13448	0.74461	0.98004	1	0.19204	0.94611	0.95862	10	0.027119	0.17365	0.55803	5	0.52189	1	1
Oxidative phosphorylation	101	0.26037	0.001996	0.024451	0.73963	1	1	0.10957	0.68663	0.78244	76	0.089878	0.41317	0.76359	25	0.16945	0.93014	1
Oxytocin signaling pathway	66	0.59437	0.97605	1	0.40563	0.025948	0.097804	0.083464	0.28942	0.64907	26	0.076266	0.3493	0.7164	40	0.088143	0.3493	0.71885
PI3K-Akt signaling pathway	151	0.58406	1	1	0.41594	0.001996	0.014671	0.07754	0.091816	0.43539	64	0.11012	0.70858	0.93201	87	0.053572	0.013972	0.124
PPAR signaling pathway	42	0.47396	0.45709	1	0.52604	0.54491	0.95273	0.090783	0.43114	0.69184	21	0.038698	0.10579	0.50336	21	0.14287	0.83633	1
Pantothenate and CoA biosynthesis	16	0.63114	0.93214	1	0.36886	0.06986	0.2185	0.14367	0.79242	0.85867	6	0.20792	0.89621	0.96359	10	0.10511	0.57485	0.89702
Parathyroid hormone synthesis, secretion and action	54	0.33418	0.011976	0.080022	0.66582	0.99002	1	0.10543	0.64072	0.76574	35	0.054069	0.11377	0.50336	19	0.20005	0.96607	1
Pentose and glucuronate interconversions	14	0.69978	0.96208	1	0.30022	0.03992	0.13972	0.078732	0.42515	0.69184	4	0.087014	0.59082	0.87425	10	0.075419	0.39521	0.75459
Pentose phosphate pathway	21	0.90373	1	1	0.096273	0.001996	0.014671	0.0070973	0.007984	0.13041	2	0.02639	0.59082	0.87425	19	0.0050665	0.005988	0.065408
Phenylalanine metabolism	8	0.65716	0.8483	1	0.34284	0.15369	0.37655	0.11917	0.6507	0.76846	3	0.24464	0.85629	0.96359	5	0.043883	0.39521	0.75459
Phenylalanine, tyrosine and tryptophan biosynthesis	3	0.78593	0.86627	1	0.21407	0.13573	0.34812	0.23853	0.82635	0.88666	1	0.71559	0.96008	0.99041	2	4.5695e-06	0.02994	0.1466
Phosphatidylinositol signaling system	63	0.61976	0.99202	1	0.38024	0.00998	0.047325	0.10899	0.67465	0.77938	25	0.17912	0.97006	0.99041	38	0.06285	0.13772	0.4161
Phospholipase D signaling pathway	67	0.5588	0.91218	1	0.4412	0.08982	0.25538	0.096755	0.48902	0.72612	29	0.092443	0.51896	0.86101	38	0.10005	0.53493	0.85348
Phosphonate and phosphinate metabolism	5	0.40442	0.35928	0.97627	0.59558	0.64271	0.98721	0.0088499	0.17764	0.55689	3	0.014749	0.34531	0.7164	2	1.2524e-06	0.003992	0.047239
Platelet activation	63	0.50194	0.64671	1	0.49806	0.35529	0.66958	0.085042	0.31737	0.64942	30	0.043358	0.061876	0.41063	33	0.12294	0.74451	0.96991
Porphyrin and chlorophyll metabolism	23	0.45587	0.40519	0.97962	0.54413	0.59681	0.97478	0.069533	0.26547	0.63974	13	0.098822	0.60479	0.87425	10	0.031458	0.18762	0.51781
Primary bile acid biosynthesis	9	0.28981	0.10778	0.41696	0.71019	0.89421	1	0.088178	0.501	0.72641	6	0.00084248	0.02994	0.35867	3	0.26285	0.86228	1
Progesterone-mediated oocyte maturation	57	0.54722	0.87625	1	0.45278	0.12575	0.33009	0.13101	0.86826	0.90521	24	0.080213	0.35329	0.7164	33	0.16795	0.9481	1
Prolactin signaling pathway	33	0.76699	1	1	0.23301	0.001996	0.014671	0.038827	0.027944	0.22821	8	0.11892	0.67465	0.90366	25	0.013196	0.003992	0.047239
Propanoate metabolism	27	0.33236	0.041916	0.19876	0.66764	0.96008	1	0.075055	0.30339	0.64942	18	0.054831	0.21357	0.62946	9	0.1155	0.62275	0.92116
Purine metabolism	73	0.64188	0.998	1	0.35812	0.003992	0.023473	0.06657	0.097804	0.44929	25	0.051481	0.1497	0.53308	48	0.074429	0.26148	0.60868
Pyrimidine metabolism	41	0.68836	1	1	0.31164	0.001996	0.014671	0.11712	0.72255	0.80466	12	0.1353	0.74651	0.95281	29	0.1096	0.60479	0.91663
Pyruvate metabolism	29	0.53222	0.71856	1	0.46778	0.28343	0.58683	0.053962	0.10778	0.48013	13	0.016686	0.05988	0.41063	16	0.084248	0.40719	0.75459
RIG-I-like receptor signaling pathway	34	0.7785	1	1	0.2215	0.001996	0.014671	0.059531	0.15768	0.55689	8	0.18512	0.88623	0.96359	26	0.020888	0.021956	0.14172
Rap1 signaling pathway	93	0.4601	0.33533	0.96654	0.5399	0.66667	1	0.10424	0.67864	0.77938	49	0.074205	0.26747	0.67327	44	0.13769	0.86627	1
Ras signaling pathway	92	0.57155	0.96208	1	0.42845	0.03992	0.13972	0.066727	0.061876	0.39547	41	0.11346	0.73253	0.94646	51	0.02916	0.003992	0.047239
Regulation of lipolysis in adipocytes	21	0.52975	0.69261	1	0.47025	0.30938	0.60588	0.10217	0.58483	0.72737	9	0.021951	0.16766	0.55803	12	0.16233	0.83433	1
Relaxin signaling pathway	63	0.52426	0.76248	1	0.47574	0.23952	0.53348	0.098025	0.52096	0.72737	30	0.10387	0.6008	0.87425	33	0.092715	0.43912	0.76834
Renin secretion	25	0.3627	0.093812	0.38307	0.6373	0.90818	1	0.014111	0.001996	0.058683	16	0.015239	0.031936	0.35867	9	0.012107	0.073852	0.28343
Renin-angiotensin system	9	0.57631	0.75449	1	0.42369	0.2475	0.54303	0.063553	0.38922	0.68577	4	0.11819	0.65669	0.88774	5	0.019844	0.28343	0.61919
Retinol metabolism	15	0.33543	0.10778	0.41696	0.66457	0.89421	1	0.0048482	0.013972	0.16766	10	0.0067822	0.03992	0.38249	5	0.00098022	0.065868	0.25981
Riboflavin metabolism	7	0.60882	0.76647	1	0.39118	0.23553	0.53266	0.086615	0.50499	0.72641	3	0.18831	0.79242	0.96359	4	0.010344	0.23154	0.57681
Selenocompound metabolism	13	0.7645	0.98802	1	0.2355	0.013972	0.058683	0.0099623	0.033932	0.26253	3	0.0010732	0.13373	0.52306	10	0.012629	0.08982	0.318
Sphingolipid metabolism	30	0.16999	0.001996	0.024451	0.83001	1	1	0.15761	0.93214	0.95821	26	0.13322	0.82435	0.96359	4	0.31612	0.9501	1
Sphingolipid signaling pathway	78	0.58255	0.97804	1	0.41745	0.023952	0.092657	0.094308	0.45309	0.6938	33	0.12476	0.77844	0.96359	45	0.071975	0.18962	0.51781
Starch and sucrose metabolism	20	0.74945	0.99601	1	0.25055	0.005988	0.030353	0.0047997	0.005988	0.12575	5	0.007417	0.17964	0.55803	15	0.0039273	0.003992	0.047239
Steroid biosynthesis	15	0.071888	0.001996	0.024451	0.92811	1	1	0.04835	0.18363	0.55689	14	0.031496	0.11178	0.50336	1	0.28431	0.87026	1
Steroid hormone biosynthesis	16	0.46359	0.50299	1	0.53641	0.499	0.9056	0.12009	0.65469	0.76846	8	0.047258	0.33134	0.7164	8	0.19291	0.86228	1
Sulfur metabolism	8	0.62984	0.81437	1	0.37016	0.18762	0.43779	0.020041	0.15968	0.55689	3	0.039635	0.47505	0.82282	5	0.0082851	0.19361	0.51874
Synthesis and degradation of ketone bodies	8	0.34812	0.22555	0.78942	0.65188	0.77645	1	0.05991	0.36527	0.67118	5	0.0049128	0.14571	0.53184	3	0.15157	0.71856	0.9695
T cell receptor signaling pathway	53	0.84225	1	1	0.15775	0.001996	0.014671	0.05131	0.045908	0.32136	9	0.22209	0.95409	0.99041	44	0.016377	0.001996	0.047239
TGF-beta signaling pathway	48	0.43095	0.27146	0.83134	0.56905	0.73054	1	0.042688	0.017964	0.17605	27	0.0263	0.027944	0.35867	21	0.063758	0.22555	0.57193
TNF signaling pathway	61	0.66275	1	1	0.33725	0.001996	0.014671	0.063166	0.087824	0.43539	21	0.1121	0.68263	0.90604	40	0.037478	0.033932	0.16061
Taurine and hypotaurine metabolism	4	0.60712	0.69461	1	0.39288	0.30739	0.60588	0.22083	0.84232	0.89725	2	0.43507	0.9521	0.99041	2	0.006591	0.44311	0.76834
Terpenoid backbone biosynthesis	21	0.58283	0.86228	1	0.41717	0.13972	0.34812	0.094359	0.53094	0.72737	8	0.028768	0.23353	0.65299	13	0.13472	0.74251	0.96991
Th1 and Th2 cell differentiation	36	0.66102	0.99601	1	0.33898	0.005988	0.030353	0.046861	0.071856	0.40626	12	0.053347	0.2475	0.65701	24	0.043618	0.065868	0.25981
Th17 cell differentiation	47	0.63125	0.99002	1	0.36875	0.011976	0.053348	0.0433	0.015968	0.16766	17	0.040365	0.13972	0.52306	30	0.044963	0.045908	0.19173
Thermogenesis	166	0.31456	0.001996	0.024451	0.68544	1	1	0.10666	0.71257	0.79961	115	0.087571	0.33733	0.7164	51	0.14971	0.9481	1
Thiamine metabolism	9	0.39241	0.30539	0.91545	0.60759	0.69661	1	0.10665	0.6008	0.73475	5	0.0023226	0.083832	0.48916	4	0.23706	0.88024	1
Thyroid hormone signaling pathway	74	0.4608	0.36527	0.97627	0.5392	0.63673	0.98721	0.059449	0.053892	0.3601	39	0.033299	0.011976	0.24979	35	0.088587	0.39122	0.75459
Thyroid hormone synthesis	36	0.27145	0.003992	0.036677	0.72855	0.998	1	0.096361	0.49501	0.72641	25	0.020273	0.017964	0.3238	11	0.26929	0.98403	1
Toll-like receptor signaling pathway	45	0.75084	1	1	0.24916	0.001996	0.014671	0.055602	0.085828	0.43539	12	0.16991	0.86826	0.96359	33	0.014036	0.001996	0.047239
Tryptophan metabolism	28	0.46693	0.47106	1	0.53307	0.53094	0.94034	0.068618	0.26347	0.63974	14	0.0024768	0.001996	0.24979	14	0.13476	0.72455	0.9695
Tyrosine metabolism	15	0.55832	0.74651	1	0.44168	0.25549	0.54856	0.079318	0.3992	0.68577	7	0.13852	0.72455	0.9445	8	0.027512	0.24152	0.58128
Ubiquinone and other terpenoid-quinone biosynthesis	9	0.3491	0.20758	0.74427	0.6509	0.79441	1	0.034617	0.22754	0.6135	6	0.049613	0.39321	0.74557	3	0.0046252	0.25749	0.60868
VEGF signaling pathway	33	0.79692	1	1	0.20308	0.001996	0.014671	0.030706	0.015968	0.16766	7	0.11502	0.63872	0.87975	26	0.0080066	0.003992	0.047239
Valine, leucine and isoleucine degradation	45	0.30942	0.00998	0.06986	0.69058	0.99202	1	0.093067	0.44112	0.69184	31	0.065089	0.23952	0.65299	14	0.15502	0.83832	1
Vitamin B6 metabolism	5	0.78318	0.90419	1	0.21682	0.097804	0.2614	0.033976	0.32335	0.64942	1	0.00084537	0.46707	0.82159	4	0.042258	0.40918	0.75459
Wnt signaling pathway	64	0.56915	0.93812	1	0.43085	0.063872	0.20411	0.075743	0.1996	0.57532	28	0.10177	0.57086	0.87425	36	0.0555	0.095808	0.32392
alpha-Linolenic acid metabolism	5	0.10159	0.035928	0.17605	0.89841	0.96607	1	0.19788	0.85828	0.90521	4	0.00066163	0.08982	0.48916	1	0.98675	0.998	1
beta-Alanine metabolism	19	0.45489	0.39122	0.97962	0.54511	0.61078	0.98664	0.067178	0.28743	0.64907	10	0.028109	0.17964	0.55803	9	0.11059	0.60479	0.91663
cAMP signaling pathway	80	0.44765	0.2495	0.79908	0.55235	0.7525	1	0.085294	0.36527	0.67118	44	0.073264	0.25549	0.65952	36	0.099996	0.52096	0.8503
cGMP-PKG signaling pathway	73	0.43882	0.23154	0.79153	0.56118	0.77046	1	0.081371	0.25948	0.63974	40	0.050096	0.093812	0.48916	33	0.11928	0.70659	0.9695
mTOR signaling pathway	93	0.68163	1	1	0.31837	0.001996	0.014671	0.055245	0.00998	0.14671	29	0.0676	0.28543	0.69454	64	0.049646	0.02994	0.1466

## Sheet: 48hpi
Name	Genes (tot)	Stat (dist.dir.up)	p (dist.dir.up)	p adj (dist.dir.up)	Stat (dist.dir.dn)	p (dist.dir.dn)	p adj (dist.dir.dn)	Stat (non-dir.)	p (non-dir.)	p adj (non-dir.)	Genes (up)	Stat (mix.dir.up)	p (mix.dir.up)	p adj (mix.dir.up)	Genes (down)	Stat (mix.dir.dn)	p (mix.dir.dn)	p adj (mix.dir.dn)
ABC transporters	25	0.13763	0.001996	0.024451	0.86237	1	1	0.11602	0.74451	0.83544	21	0.042428	0.12575	0.55015	4	0.50236	0.99601	0.99601
AMPK signaling pathway	81	0.66198	0.99601	1	0.33802	0.005988	0.048902	0.085756	0.44511	0.73202	28	0.14619	0.87824	0.93552	53	0.05383	0.0998	0.51249
Adipocytokine signaling pathway	40	0.66304	0.98204	1	0.33696	0.01996	0.11954	0.11515	0.81038	0.8509	13	0.14034	0.7525	0.90585	27	0.10301	0.69661	0.95051
Alanine, aspartate and glutamate metabolism	24	0.7036	0.98004	1	0.2964	0.021956	0.11954	0.020152	0.027944	0.37492	7	0.018311	0.20958	0.64184	17	0.020911	0.091816	0.51249
Aldosterone synthesis and secretion	42	0.41486	0.065868	0.37241	0.58514	0.93613	1	0.084859	0.41717	0.73202	24	0.050263	0.14571	0.55015	18	0.13099	0.8503	0.97833
Amino sugar and nucleotide sugar metabolism	39	0.76799	1	1	0.23201	0.001996	0.026674	0.095135	0.55689	0.76507	9	0.20074	0.91417	0.94636	30	0.063453	0.31138	0.75768
Antigen processing and presentation	32	0.48563	0.37126	1	0.51437	0.63074	0.94611	0.06131	0.1976	0.63573	16	0.032577	0.11377	0.55015	16	0.090042	0.61477	0.93196
Apelin signaling pathway	72	0.44742	0.08982	0.47156	0.55258	0.91218	1	0.075279	0.28743	0.65252	39	0.04934	0.073852	0.55015	33	0.10593	0.73852	0.96193
Arachidonic acid metabolism	15	0.72191	0.96008	1	0.27809	0.041916	0.17605	0.13489	0.7984	0.84647	4	0.21008	0.82435	0.92588	11	0.10755	0.67665	0.95051
Arginine and proline metabolism	31	0.56051	0.73054	1	0.43949	0.27146	0.61989	0.034704	0.053892	0.37725	14	0.065255	0.31337	0.7312	17	0.0095434	0.023952	0.29142
Arginine biosynthesis	15	0.60381	0.81238	1	0.39619	0.18962	0.5068	0.052021	0.2475	0.63573	6	0.074547	0.46507	0.84397	9	0.037004	0.30339	0.75768
Ascorbate and aldarate metabolism	10	0.52617	0.56287	1	0.47383	0.43912	0.78721	0.073832	0.44511	0.73202	5	0.12617	0.64671	0.89358	5	0.021493	0.35529	0.79803
B cell receptor signaling pathway	42	0.74677	1	1	0.25323	0.001996	0.026674	0.11811	0.78244	0.83955	10	0.18448	0.90419	0.94267	32	0.097367	0.68064	0.95051
Biosynthesis of unsaturated fatty acids	21	0.49205	0.42116	1	0.50795	0.58084	0.92808	0.064751	0.29741	0.65252	10	0.0012917	0.017964	0.32601	11	0.12244	0.75649	0.96218
Butanoate metabolism	20	0.45884	0.32335	1	0.54116	0.67864	0.97425	0.024113	0.053892	0.37725	11	0.037999	0.19561	0.63148	9	0.0071408	0.06986	0.50998
C-type lectin receptor signaling pathway	51	0.67055	0.99401	1	0.32945	0.007984	0.058683	0.066936	0.22954	0.63573	16	0.056556	0.26148	0.67434	35	0.071681	0.36128	0.79919
Caffeine metabolism	3	0.68349	0.80439	1	0.31651	0.1976	0.51871	0.41748	0.97006	0.97006	1	0.67669	0.9481	0.96118	2	0.28788	0.87824	0.97833
Calcium signaling pathway	68	0.43671	0.061876	0.37241	0.56329	0.94012	1	0.067978	0.19361	0.63573	38	0.052834	0.091816	0.55015	30	0.087161	0.58683	0.92385
Cell adhesion molecules (CAMs)	40	0.25881	0.001996	0.024451	0.74119	1	1	0.059399	0.18962	0.63573	30	0.051345	0.13174	0.55015	10	0.083563	0.49701	0.88491
Chemokine signaling pathway	77	0.57736	0.89022	1	0.42264	0.11178	0.37343	0.0728	0.23752	0.63573	31	0.040624	0.065868	0.55015	46	0.094483	0.68263	0.95051
Circadian entrainment	34	0.42318	0.15369	0.66449	0.57682	0.8483	1	0.11207	0.77645	0.83955	19	0.068063	0.29541	0.71189	15	0.16782	0.93014	0.97833
Circadian rhythm	16	0.70021	0.94411	1	0.29979	0.057884	0.22997	0.10408	0.65269	0.83058	4	0.0090144	0.2515	0.66542	12	0.13577	0.81637	0.97833
Citrate cycle (TCA cycle)	27	0.2149	0.005988	0.062874	0.7851	0.99601	1	0.059693	0.21158	0.63573	22	0.073096	0.34331	0.74216	5	0.00072242	0.063872	0.49081
Complement and coagulation cascades	42	0.36081	0.005988	0.062874	0.63919	0.99601	1	0.12647	0.84232	0.86588	26	0.069611	0.3014	0.7146	16	0.21887	0.98603	0.99601
Cortisol synthesis and secretion	28	0.26354	0.001996	0.024451	0.73646	1	1	0.063275	0.2475	0.63573	20	0.013242	0.013972	0.32601	8	0.18836	0.92016	0.97833
Cysteine and methionine metabolism	40	0.87262	1	1	0.12738	0.001996	0.026674	0.027889	0.015968	0.37492	5	0.092488	0.56687	0.88648	35	0.018661	0.025948	0.29142
Cytokine-cytokine receptor interaction	39	0.09049	0.001996	0.024451	0.90951	1	1	0.034431	0.027944	0.37492	36	0.033348	0.01996	0.32601	3	0.047425	0.58283	0.92385
Cytosolic DNA-sensing pathway	27	0.56289	0.70858	1	0.43711	0.29341	0.61989	0.11357	0.70858	0.83058	12	0.14427	0.75649	0.90585	15	0.089012	0.59481	0.92385
D-Glutamine and D-glutamate metabolism	4	0.24963	0.10778	0.54636	0.75037	0.89421	1	0.00092126	0.11577	0.47581	3	0.00012152	0.075848	0.55015	1	0.0033205	0.58683	0.92385
ECM-receptor interaction	35	0.32303	0.007984	0.069038	0.67697	0.99401	1	0.046369	0.085828	0.44518	23	0.0051033	0.001996	0.14671	12	0.12546	0.77246	0.96392
ErbB signaling pathway	56	0.78211	1	1	0.21789	0.001996	0.026674	0.090015	0.52894	0.76507	13	0.25527	0.99401	0.99401	43	0.040054	0.0499	0.4457
Estrogen signaling pathway	61	0.49239	0.36327	1	0.50761	0.63872	0.94841	0.074369	0.29541	0.65252	30	0.043466	0.08982	0.55015	31	0.10427	0.71257	0.95826
Ether lipid metabolism	20	0.42564	0.21357	0.82005	0.57436	0.78842	1	0.1139	0.72455	0.83058	12	0.13765	0.73253	0.90585	8	0.078261	0.52295	0.90894
Fatty acid biosynthesis	8	0.62455	0.74451	1	0.37545	0.25749	0.61989	0.00091647	0.025948	0.37492	3	2.2588e-05	0.037924	0.55015	5	0.0014528	0.1018	0.51249
Fatty acid degradation	32	0.44393	0.22954	0.84356	0.55607	0.77246	1	0.033562	0.037924	0.37492	18	0.041256	0.1477	0.55015	14	0.023671	0.13174	0.53426
Fatty acid elongation	21	0.32713	0.037924	0.2534	0.67287	0.96407	1	0.11574	0.71457	0.83058	14	0.077497	0.40918	0.80591	7	0.19222	0.91417	0.97833
Fc epsilon RI signaling pathway	32	0.85098	1	1	0.14902	0.001996	0.026674	0.082798	0.44511	0.73202	4	0.13904	0.66667	0.89358	28	0.074764	0.3992	0.83262
Fc gamma R-mediated phagocytosis	55	0.74306	1	1	0.25694	0.001996	0.026674	0.060465	0.11976	0.47581	14	0.10935	0.63872	0.89358	41	0.043773	0.097804	0.51249
Folate biosynthesis	15	0.74409	0.97804	1	0.25591	0.023952	0.12575	0.12139	0.73054	0.83058	3	0.023911	0.50898	0.84397	12	0.14575	0.85828	0.97833
FoxO signaling pathway	73	0.68738	0.99601	1	0.31262	0.005988	0.048902	0.060978	0.10579	0.47581	22	0.06385	0.25349	0.66542	51	0.05974	0.1517	0.56098
Fructose and mannose metabolism	25	0.78667	0.998	1	0.21333	0.003992	0.039122	0.030312	0.045908	0.37492	5	0.009127	0.1976	0.63148	20	0.035609	0.12974	0.53426
Galactose metabolism	18	0.63519	0.8523	1	0.36481	0.1497	0.46821	0.048342	0.20359	0.63573	7	0.12407	0.66068	0.89358	11	0.0001529	0.005988	0.14571
Glucagon signaling pathway	60	0.6903	1	1	0.3097	0.001996	0.026674	0.072629	0.25549	0.63573	18	0.088704	0.48503	0.84397	42	0.06574	0.27745	0.74644
Glutathione metabolism	38	0.72849	1	1	0.27151	0.001996	0.026674	0.061014	0.21756	0.63573	11	0.16744	0.84431	0.92588	27	0.017657	0.011976	0.17485
Glycerolipid metabolism	36	0.53315	0.62275	1	0.46685	0.37924	0.72401	0.08331	0.45908	0.73202	17	0.099594	0.51896	0.84764	19	0.06874	0.41517	0.84187
Glycerophospholipid metabolism	50	0.39324	0.027944	0.19561	0.60676	0.97405	1	0.093702	0.63473	0.83058	30	0.06681	0.23752	0.66542	20	0.13404	0.8503	0.97833
Glycine, serine and threonine metabolism	31	0.69124	0.98403	1	0.30876	0.017964	0.11481	0.05343	0.18363	0.63573	10	0.12565	0.70459	0.90585	21	0.019037	0.033932	0.35386
Glycolysis / Gluconeogenesis	39	0.71652	0.99401	1	0.28348	0.007984	0.058683	0.053716	0.11178	0.47581	12	0.16597	0.82635	0.92588	27	0.0038253	0.001996	0.14571
Glycosaminoglycan degradation	11	0.52559	0.53693	1	0.47441	0.46507	0.82368	0.053268	0.32735	0.67774	5	0.014894	0.23752	0.66542	6	0.085246	0.58882	0.92385
Glycosylphosphatidylinositol (GPI)-anchor biosynthesis	13	0.31347	0.071856	0.39122	0.68653	0.93014	1	0.11529	0.71058	0.83058	9	0.091619	0.54491	0.87067	4	0.16856	0.78244	0.9681
Glyoxylate and dicarboxylate metabolism	25	0.55072	0.65269	1	0.44928	0.3493	0.67562	0.078545	0.40918	0.73202	12	0.14581	0.76248	0.90585	13	0.016451	0.085828	0.51249
GnRH signaling pathway	46	0.57839	0.83832	1	0.42161	0.16367	0.47752	0.040239	0.01996	0.37492	19	0.027975	0.081836	0.55015	27	0.048869	0.15768	0.56151
HIF-1 signaling pathway	59	0.63386	0.98004	1	0.36614	0.021956	0.11954	0.071064	0.28743	0.65252	22	0.11336	0.66866	0.89358	37	0.045913	0.12974	0.53426
Hedgehog signaling pathway	25	0.56449	0.70459	1	0.43551	0.29741	0.61989	0.070446	0.33533	0.68463	11	0.090258	0.49102	0.84397	14	0.054879	0.36926	0.80245
Hematopoietic cell lineage	18	0.34874	0.051896	0.33168	0.65126	0.9501	1	0.062197	0.31138	0.65808	12	0.069752	0.33733	0.74216	6	0.047089	0.45309	0.85911
Hippo signaling pathway	71	0.5425	0.68064	1	0.4575	0.32136	0.6561	0.061831	0.10579	0.47581	32	0.053521	0.10978	0.55015	39	0.06865	0.32335	0.77393
Histidine metabolism	13	0.76883	0.98403	1	0.23117	0.017964	0.11481	0.014517	0.06986	0.39498	3	0.029712	0.53293	0.86089	10	0.0099583	0.095808	0.51249
IL-17 signaling pathway	45	0.52839	0.56886	1	0.47161	0.43313	0.78606	0.11132	0.77445	0.83955	21	0.10868	0.62874	0.89358	24	0.11362	0.79242	0.97139
Inositol phosphate metabolism	49	0.62797	0.9501	1	0.37203	0.051896	0.21191	0.084331	0.42715	0.73202	19	0.1493	0.8503	0.92588	30	0.043182	0.14172	0.54449
Insulin secretion	28	0.34075	0.027944	0.19561	0.65925	0.97405	1	0.082144	0.43313	0.73202	18	0.038387	0.14371	0.55015	10	0.16091	0.83832	0.97833
Insulin signaling pathway	90	0.71296	1	1	0.28704	0.001996	0.026674	0.081793	0.35928	0.70419	25	0.11388	0.70659	0.90585	65	0.069454	0.28343	0.74644
Intestinal immune network for IgA production	5	0.23197	0.11976	0.58683	0.76803	0.88224	1	0.064259	0.54291	0.76507	4	0.080118	0.51098	0.84397	1	0.00081906	0.47505	0.87425
Leukocyte transendothelial migration	48	0.56587	0.77445	1	0.43413	0.22754	0.58177	0.052753	0.11976	0.47581	21	0.067987	0.32136	0.73812	27	0.040904	0.11178	0.53426
Linoleic acid metabolism	3	0.30213	0.14571	0.64907	0.69787	0.85629	1	0.12106	0.69062	0.83058	2	0.043984	0.62675	0.89358	1	0.27521	0.88024	0.97833
Longevity regulating pathway	71	0.51546	0.49301	1	0.48454	0.50898	0.86338	0.11198	0.83034	0.86567	34	0.10509	0.63673	0.89358	37	0.11831	0.86826	0.97833
Lysine degradation	47	0.4745	0.31138	1	0.5255	0.69062	0.97616	0.096345	0.67066	0.83058	25	0.10263	0.60679	0.89198	22	0.089202	0.58084	0.92385
MAPK signaling pathway	139	0.58802	0.97006	1	0.41198	0.031936	0.14226	0.092024	0.55289	0.76507	56	0.091612	0.48503	0.84397	83	0.092302	0.62275	0.93196
Mannose type O-glycan biosynthesis	11	0.11199	0.001996	0.024451	0.88801	1	1	0.042159	0.26946	0.64936	10	0.046372	0.2515	0.66542	1	3.1975e-05	0.23353	0.6994
Melanogenesis	35	0.50581	0.47505	1	0.49419	0.52695	0.88024	0.095836	0.56687	0.77157	17	0.081214	0.39521	0.80591	18	0.10965	0.72854	0.95826
Metabolism of xenobiotics by cytochrome P450	26	0.76062	0.998	1	0.23938	0.003992	0.039122	0.065217	0.25948	0.63573	6	0.10399	0.60679	0.89198	20	0.053585	0.26946	0.74644
Mucin type O-glycan biosynthesis	15	0.14608	0.001996	0.024451	0.85392	1	1	0.02685	0.11377	0.47581	13	0.0302	0.11178	0.55015	2	0.0050758	0.44112	0.85871
N-Glycan biosynthesis	40	0.1556	0.001996	0.024451	0.8444	1	1	0.082904	0.47705	0.73202	34	0.05536	0.1497	0.55015	6	0.23899	0.96407	0.99123
NF-kappa B signaling pathway	42	0.54237	0.66866	1	0.45763	0.33333	0.66216	0.04495	0.05988	0.38271	19	0.038086	0.12375	0.55015	23	0.050621	0.25948	0.74283
NOD-like receptor signaling pathway	90	0.50036	0.43713	1	0.49964	0.56487	0.91248	0.057032	0.03992	0.37492	45	0.057757	0.13373	0.55015	45	0.056306	0.17365	0.58283
Natural killer cell mediated cytotoxicity	45	0.6484	0.97405	1	0.3516	0.027944	0.14165	0.10534	0.72056	0.83058	16	0.15925	0.90419	0.94267	29	0.07559	0.42914	0.84669
Neomycin, kanamycin and gentamicin biosynthesis	2	4.1356e-06	0.01996	0.16301	1	0.98204	1	8.2711e-06	0.033932	0.37492	2	8.2711e-06	0.051896	0.55015	0	NA	NA	NA
Neuroactive ligand-receptor interaction	23	0.30025	0.007984	0.069038	0.69975	0.99401	1	0.071286	0.36727	0.71037	16	0.04535	0.18962	0.63148	7	0.13057	0.74451	0.96193
Nicotinate and nicotinamide metabolism	20	0.51409	0.50499	1	0.48591	0.49701	0.85953	0.028546	0.065868	0.38731	10	0.056725	0.32934	0.74216	10	0.00036645	0.005988	0.14571
Nitrogen metabolism	9	0.4752	0.4012	1	0.5248	0.6008	0.93955	0.078978	0.47904	0.73202	5	0.12644	0.64671	0.89358	4	0.019658	0.37525	0.80245
Notch signaling pathway	29	0.45843	0.25549	0.91602	0.54157	0.74651	1	0.10779	0.68862	0.83058	15	0.05716	0.26747	0.67789	14	0.16203	0.91816	0.97833
One carbon pool by folate	17	0.73654	0.97206	1	0.26346	0.02994	0.14226	0.06169	0.30938	0.65808	5	0.2091	0.88623	0.93723	12	0.0002716	0.003992	0.14571
Other glycan degradation	14	0.37766	0.16766	0.70419	0.62234	0.83433	1	0.10576	0.66267	0.83058	8	0.0034553	0.051896	0.55015	6	0.24218	0.96407	0.99123
Other types of O-glycan biosynthesis	15	0.23811	0.007984	0.069038	0.76189	0.99401	1	0.082593	0.47904	0.73202	11	0.017376	0.093812	0.55015	4	0.26194	0.92016	0.97833
Ovarian steroidogenesis	15	0.19274	0.001996	0.024451	0.80726	1	1	0.018046	0.05988	0.38271	12	0.0022037	0.011976	0.32601	3	0.081415	0.69062	0.95051
Oxidative phosphorylation	101	0.19833	0.001996	0.024451	0.80167	1	1	0.045983	0.013972	0.37492	81	0.029055	0.001996	0.14671	20	0.11454	0.75848	0.96218
Oxytocin signaling pathway	66	0.61393	0.93413	1	0.38607	0.067864	0.24332	0.089587	0.5489	0.76507	25	0.099021	0.57485	0.88922	41	0.083835	0.57485	0.92385
PI3K-Akt signaling pathway	151	0.58237	0.97006	1	0.41763	0.031936	0.14226	0.073731	0.14371	0.55594	62	0.072656	0.18363	0.63148	89	0.07448	0.29142	0.74644
PPAR signaling pathway	42	0.58426	0.83633	1	0.41574	0.16567	0.47752	0.040706	0.03992	0.37492	18	0.077438	0.38323	0.80591	24	0.013158	0.023952	0.29142
Pantothenate and CoA biosynthesis	16	0.56615	0.66866	1	0.43385	0.33333	0.66216	0.019515	0.051896	0.37725	7	0.030642	0.27545	0.67974	9	0.010861	0.0998	0.51249
Parathyroid hormone synthesis, secretion and action	54	0.45745	0.21357	0.82005	0.54255	0.78842	1	0.13623	0.94411	0.95713	28	0.085024	0.40918	0.80591	26	0.19138	0.99401	0.99601
Pentose and glucuronate interconversions	14	0.62345	0.81437	1	0.37655	0.18762	0.5068	0.10811	0.67066	0.83058	6	0.24752	0.93214	0.95563	8	0.0035529	0.051896	0.4457
Pentose phosphate pathway	21	0.80096	0.998	1	0.19904	0.003992	0.039122	0.071724	0.35729	0.70419	4	0.1433	0.66866	0.89358	17	0.054881	0.32934	0.77555
Phenylalanine metabolism	8	0.47172	0.37325	1	0.52828	0.62874	0.94611	0.0657	0.46307	0.73202	4	0.0091321	0.2515	0.66542	4	0.12227	0.69661	0.95051
Phenylalanine, tyrosine and tryptophan biosynthesis	3	0.66664	0.72255	1	0.33336	0.27944	0.61989	5.5832e-05	0.03992	0.37492	1	1.625e-06	0.10778	0.55015	2	8.2936e-05	0.13972	0.54449
Phosphatidylinositol signaling system	63	0.60969	0.94012	1	0.39031	0.061876	0.23936	0.084828	0.43114	0.73202	25	0.12329	0.74251	0.90585	38	0.059522	0.23952	0.6994
Phospholipase D signaling pathway	67	0.49386	0.38523	1	0.50614	0.61677	0.94442	0.090789	0.53293	0.76507	34	0.092058	0.50499	0.84397	33	0.089482	0.60479	0.92947
Phosphonate and phosphinate metabolism	5	0.61187	0.72655	1	0.38813	0.27545	0.61989	0.098601	0.63872	0.83058	2	0.15293	0.76846	0.90585	3	0.06238	0.64471	0.93196
Platelet activation	63	0.53702	0.65469	1	0.46298	0.34731	0.67562	0.050385	0.043912	0.37492	28	0.014981	0.00998	0.32601	35	0.078708	0.4511	0.85911
Porphyrin and chlorophyll metabolism	23	0.56771	0.70259	1	0.43229	0.2994	0.61989	0.060966	0.29142	0.65252	10	0.07584	0.43912	0.83832	13	0.049525	0.29142	0.74644
Primary bile acid biosynthesis	9	0.34887	0.14371	0.64907	0.65113	0.85828	1	0.034391	0.25549	0.63573	6	0.049101	0.39521	0.80591	3	0.0049709	0.34531	0.79229
Progesterone-mediated oocyte maturation	57	0.55964	0.77246	1	0.44036	0.22954	0.58177	0.081847	0.44311	0.73202	25	0.089275	0.49102	0.84397	32	0.076043	0.49501	0.88491
Prolactin signaling pathway	33	0.8118	1	1	0.1882	0.001996	0.026674	0.078454	0.38523	0.73202	6	0.18065	0.84232	0.92588	27	0.055742	0.21557	0.66964
Propanoate metabolism	27	0.5319	0.60479	1	0.4681	0.39721	0.74282	0.060467	0.22156	0.63573	13	0.090579	0.48902	0.84397	14	0.032506	0.16966	0.58283
Purine metabolism	73	0.65177	0.99002	1	0.34823	0.011976	0.083832	0.077074	0.31337	0.65808	27	0.16267	0.93613	0.95563	46	0.026833	0.007984	0.14571
Pyrimidine metabolism	41	0.64689	0.98004	1	0.35311	0.021956	0.11954	0.064918	0.24152	0.63573	15	0.12357	0.72455	0.90585	26	0.031082	0.055888	0.45332
Pyruvate metabolism	29	0.55978	0.70259	1	0.44022	0.2994	0.61989	0.02737	0.037924	0.37492	13	0.048509	0.20559	0.64184	16	0.010195	0.043912	0.42741
RIG-I-like receptor signaling pathway	34	0.65637	0.97006	1	0.34363	0.031936	0.14226	0.10642	0.73453	0.83058	12	0.17715	0.86028	0.92986	22	0.067845	0.37924	0.80245
Rap1 signaling pathway	93	0.51858	0.52695	1	0.48142	0.47505	0.83134	0.063331	0.087824	0.44518	44	0.049393	0.083832	0.55015	49	0.075847	0.42116	0.84232
Ras signaling pathway	92	0.58921	0.93613	1	0.41079	0.065868	0.24332	0.086889	0.4511	0.73202	36	0.06123	0.18363	0.63148	56	0.10338	0.7984	0.97139
Regulation of lipolysis in adipocytes	21	0.47433	0.34731	1	0.52567	0.65469	0.96158	0.0066119	0.007984	0.37492	11	0.0027679	0.015968	0.32601	10	0.01084	0.097804	0.51249
Relaxin signaling pathway	63	0.52766	0.60279	1	0.47234	0.3992	0.74282	0.086885	0.46108	0.73202	29	0.068268	0.27745	0.67974	34	0.10276	0.72854	0.95826
Renin secretion	25	0.48402	0.34132	1	0.51598	0.66068	0.96158	0.036928	0.073852	0.40208	13	0.043237	0.18563	0.63148	12	0.030094	0.1996	0.63352
Renin-angiotensin system	9	0.39218	0.21357	0.82005	0.60782	0.78842	1	0.1177	0.69062	0.83058	6	0.17654	0.83633	0.92588	3	1.8696e-06	0.007984	0.14571
Retinol metabolism	15	0.44891	0.27944	0.97804	0.55109	0.72255	1	0.1008	0.59481	0.79488	9	0.16553	0.84032	0.92588	6	0.0037244	0.11776	0.53426
Riboflavin metabolism	7	0.47467	0.4491	1	0.52533	0.55289	0.90306	0.13069	0.71457	0.83058	4	0.19502	0.79441	0.91921	3	0.044921	0.57685	0.92385
Selenocompound metabolism	13	0.67943	0.89222	1	0.32057	0.10978	0.37343	0.047214	0.25349	0.63573	4	0.034869	0.38922	0.80591	9	0.052701	0.41517	0.84187
Sphingolipid metabolism	30	0.21212	0.001996	0.024451	0.78788	1	1	0.10899	0.70459	0.83058	24	0.083272	0.42315	0.81847	6	0.21186	0.93812	0.97833
Sphingolipid signaling pathway	78	0.56471	0.83633	1	0.43529	0.16567	0.47752	0.087292	0.48303	0.73202	34	0.10152	0.59281	0.88922	44	0.076299	0.47904	0.87425
Starch and sucrose metabolism	20	0.67237	0.93214	1	0.32763	0.06986	0.24451	0.04775	0.16766	0.63197	7	0.13212	0.69062	0.90585	13	0.0023181	0.00998	0.1619
Steroid biosynthesis	15	0.20953	0.001996	0.024451	0.79047	1	1	0.019162	0.065868	0.38731	12	0.023889	0.1018	0.55015	3	0.00025383	0.12774	0.53426
Steroid hormone biosynthesis	16	0.50781	0.49102	1	0.49219	0.51098	0.86338	0.18874	0.95609	0.96264	7	0.090701	0.50699	0.84397	9	0.265	0.99002	0.99601
Sulfur metabolism	8	0.68339	0.83832	1	0.31661	0.16367	0.47752	0.13325	0.78044	0.83955	2	7.2439e-05	0.14172	0.55015	6	0.17765	0.88822	0.97833
Synthesis and degradation of ketone bodies	8	0.625	0.75649	1	0.375	0.24551	0.60639	2.2896e-05	0.001996	0.29341	3	3.6221e-05	0.047904	0.55015	5	1.4901e-05	0.001996	0.14571
T cell receptor signaling pathway	53	0.75997	1	1	0.24003	0.001996	0.026674	0.099839	0.65269	0.83058	12	0.16034	0.8004	0.91921	41	0.082131	0.55289	0.92385
TGF-beta signaling pathway	48	0.57835	0.81637	1	0.42165	0.18563	0.5068	0.071183	0.27745	0.65252	19	0.0247	0.067864	0.55015	29	0.10164	0.71856	0.95826
TNF signaling pathway	61	0.61209	0.96607	1	0.38791	0.035928	0.15534	0.085599	0.42315	0.73202	24	0.12284	0.77645	0.90585	37	0.061443	0.31138	0.75768
Taurine and hypotaurine metabolism	4	0.25144	0.14571	0.64907	0.74856	0.85629	1	0.0064488	0.25948	0.63573	3	0.0062228	0.34132	0.74216	1	0.007127	0.63673	0.93196
Terpenoid backbone biosynthesis	21	0.60209	0.81637	1	0.39791	0.18563	0.5068	0.055101	0.23952	0.63573	8	0.027802	0.21756	0.65269	13	0.0719	0.46707	0.87425
Th1 and Th2 cell differentiation	36	0.64225	0.93413	1	0.35775	0.067864	0.24332	0.11493	0.78044	0.83955	13	0.16845	0.86826	0.93164	23	0.08468	0.58882	0.92385
Th17 cell differentiation	47	0.5759	0.85429	1	0.4241	0.1477	0.46821	0.11421	0.84032	0.86588	21	0.17862	0.96407	0.97068	26	0.062184	0.28942	0.74644
Thermogenesis	166	0.32041	0.001996	0.024451	0.67959	1	1	0.062702	0.031936	0.37492	113	0.047726	0.005988	0.29341	53	0.094634	0.64471	0.93196
Thiamine metabolism	9	0.50595	0.45309	1	0.49405	0.5489	0.90306	0.15079	0.8004	0.84647	4	0.058033	0.46507	0.84397	5	0.225	0.93014	0.97833
Thyroid hormone signaling pathway	74	0.55131	0.72854	1	0.44869	0.27345	0.61989	0.079927	0.34132	0.68731	34	0.11042	0.68263	0.90403	40	0.054009	0.15369	0.56098
Thyroid hormone synthesis	36	0.35045	0.027944	0.19561	0.64955	0.97405	1	0.098291	0.62675	0.83002	24	0.099386	0.58084	0.88922	12	0.096102	0.63673	0.93196
Toll-like receptor signaling pathway	45	0.71233	0.99601	1	0.28767	0.005988	0.048902	0.054165	0.11377	0.47581	13	0.097983	0.55689	0.88024	32	0.036364	0.07984	0.51249
Tryptophan metabolism	28	0.4876	0.40719	1	0.5124	0.59481	0.93955	0.085685	0.47705	0.73202	15	0.12349	0.72455	0.90585	13	0.042063	0.23952	0.6994
Tyrosine metabolism	15	0.45411	0.29142	0.99624	0.54589	0.71058	0.99481	0.040104	0.18563	0.63573	8	0.014047	0.13174	0.55015	7	0.069884	0.51297	0.90234
Ubiquinone and other terpenoid-quinone biosynthesis	9	0.26592	0.063872	0.37241	0.73408	0.93812	1	0.087485	0.53892	0.76507	7	0.11242	0.59281	0.88922	2	0.00022002	0.17565	0.58283
VEGF signaling pathway	33	0.77728	0.998	1	0.22272	0.003992	0.039122	0.086434	0.499	0.7485	7	0.15377	0.76248	0.90585	26	0.068304	0.34731	0.79229
Valine, leucine and isoleucine degradation	45	0.49002	0.38523	1	0.50998	0.61677	0.94442	0.038223	0.043912	0.37492	23	0.039602	0.091816	0.55015	22	0.036782	0.11377	0.53426
Vitamin B6 metabolism	5	0.63241	0.75449	1	0.36759	0.2475	0.60639	0.064821	0.5489	0.76507	2	0.16205	0.77246	0.90585	3	3.5175e-06	0.007984	0.14571
Wnt signaling pathway	64	0.54673	0.71856	1	0.45327	0.28343	0.61989	0.10608	0.75848	0.83955	28	0.085185	0.41118	0.80591	36	0.12233	0.86427	0.97833
alpha-Linolenic acid metabolism	5	0.3734	0.21756	0.82005	0.6266	0.78443	1	0.05689	0.50699	0.7528	3	0.0030814	0.25349	0.66542	2	0.1376	0.76447	0.96218
beta-Alanine metabolism	19	0.587	0.73852	1	0.413	0.26347	0.61989	0.050203	0.20559	0.63573	8	0.078748	0.46307	0.84397	11	0.029444	0.18563	0.60226
cAMP signaling pathway	80	0.52951	0.59681	1	0.47049	0.40519	0.74454	0.082195	0.38922	0.73202	36	0.045797	0.06986	0.55015	44	0.11198	0.83433	0.97833
cGMP-PKG signaling pathway	73	0.48369	0.31936	1	0.51631	0.68263	0.97425	0.09364	0.57884	0.78064	36	0.047985	0.083832	0.55015	37	0.13806	0.93613	0.97833
mTOR signaling pathway	93	0.56781	0.86427	1	0.43219	0.13772	0.4499	0.11979	0.90818	0.9271	39	0.11223	0.72056	0.90585	54	0.12525	0.89022	0.97833

## Sheet: 24hpi_vs_48hpi
Name	Genes (tot)	Stat (dist.dir.up)	p (dist.dir.up)	p adj (dist.dir.up)	Stat (dist.dir.dn)	p (dist.dir.dn)	p adj (dist.dir.dn)	Stat (non-dir.)	p (non-dir.)	p adj (non-dir.)	Genes (up)	Stat (mix.dir.up)	p (mix.dir.up)	p adj (mix.dir.up)	Genes (down)	Stat (mix.dir.dn)	p (mix.dir.dn)	p adj (mix.dir.dn)
ABC transporters	25	0.32142	0.00998	0.16301	0.67858	0.99202	1	0.10922	0.38124	0.99601	18	0.13337	0.54291	0.98556	7	0.047117	0.20359	0.998
AMPK signaling pathway	81	0.45951	0.10778	0.50532	0.54049	0.89421	1	0.11198	0.29341	0.99601	43	0.087344	0.093812	0.91311	38	0.13986	0.68064	0.998
Adipocytokine signaling pathway	40	0.43162	0.12375	0.50532	0.56838	0.87824	1	0.10302	0.28343	0.99601	23	0.1011	0.27545	0.98556	17	0.10563	0.37725	0.998
Alanine, aspartate and glutamate metabolism	24	0.84311	1	1	0.15689	0.001996	0.29341	0.1261	0.49301	0.99601	3	0.24927	0.7505	0.98556	21	0.10851	0.38523	0.998
Aldosterone synthesis and secretion	42	0.5045	0.39721	0.81096	0.4955	0.60479	1	0.16323	0.81836	0.99601	20	0.13085	0.57086	0.98556	22	0.19267	0.88423	0.998
Amino sugar and nucleotide sugar metabolism	39	0.5076	0.45709	0.82368	0.4924	0.54491	1	0.1289	0.52495	0.99601	19	0.12158	0.501	0.98556	20	0.13585	0.58683	0.998
Antigen processing and presentation	32	0.45671	0.21756	0.70544	0.54329	0.78443	1	0.14703	0.68263	0.99601	17	0.11572	0.47705	0.98556	15	0.18251	0.83034	0.998
Apelin signaling pathway	72	0.43036	0.055888	0.39122	0.56964	0.94611	1	0.11279	0.32735	0.99601	41	0.098685	0.22156	0.98556	31	0.13145	0.56287	0.998
Arachidonic acid metabolism	15	0.59812	0.79641	0.98538	0.40188	0.20559	1	0.010647	0.001996	0.29341	6	0.0086039	0.065868	0.73975	9	0.01201	0.045908	0.81038
Arginine and proline metabolism	31	0.53174	0.57285	0.8832	0.46826	0.42914	1	0.11528	0.4491	0.99601	16	0.20443	0.88423	0.98556	15	0.020196	0.027944	0.81038
Arginine biosynthesis	15	0.69921	0.94012	0.99881	0.30079	0.061876	0.69968	0.10182	0.36327	0.99601	4	0.062954	0.39521	0.98556	11	0.11595	0.56088	0.998
Ascorbate and aldarate metabolism	10	0.75221	0.9501	0.99881	0.24779	0.051896	0.69352	0.12321	0.50898	0.99601	3	0.37939	0.90818	0.98556	7	0.013418	0.081836	0.81038
B cell receptor signaling pathway	42	0.50767	0.40918	0.82076	0.49233	0.59281	1	0.18571	0.91018	0.99601	20	0.1611	0.76447	0.98556	22	0.20809	0.92016	0.998
Biosynthesis of unsaturated fatty acids	21	0.51074	0.4511	0.82368	0.48926	0.5509	1	0.14738	0.62675	0.99601	10	0.12732	0.53493	0.98556	11	0.16563	0.78244	0.998
Butanoate metabolism	20	0.6878	0.9521	0.99881	0.3122	0.0499	0.69352	0.03236	0.035928	0.65203	6	0.013272	0.11178	0.98353	14	0.04054	0.083832	0.81038
C-type lectin receptor signaling pathway	51	0.49771	0.38523	0.81096	0.50229	0.61677	1	0.18576	0.96208	0.99601	25	0.1648	0.79242	0.98556	26	0.20592	0.93413	0.998
Caffeine metabolism	3	0.11377	0.067864	0.39904	0.88623	0.93413	1	0.22753	0.73453	0.99601	3	0.22753	0.72455	0.98556	0	NA	NA	NA
Calcium signaling pathway	68	0.47069	0.21357	0.70544	0.52931	0.78842	1	0.1806	0.96407	0.99601	34	0.12198	0.40319	0.98556	34	0.23921	0.99601	0.998
Cell adhesion molecules (CAMs)	40	0.27925	0.001996	0.058683	0.72075	1	1	0.046219	0.007984	0.39122	28	0.0033703	0.001996	0.29142	12	0.1462	0.62675	0.998
Chemokine signaling pathway	77	0.47578	0.21557	0.70544	0.52422	0.78643	1	0.16331	0.90619	0.99601	41	0.16883	0.87425	0.98556	36	0.15701	0.7984	0.998
Circadian entrainment	34	0.51392	0.46507	0.82368	0.48608	0.53693	1	0.13105	0.56287	0.99601	16	0.10632	0.38922	0.98556	18	0.15302	0.66267	0.998
Circadian rhythm	16	0.52619	0.54491	0.86463	0.47381	0.45709	1	0.11484	0.41916	0.99601	8	0.16722	0.6986	0.98556	8	0.062464	0.27545	0.998
Citrate cycle (TCA cycle)	27	0.54128	0.61277	0.90078	0.45872	0.38922	1	0.075616	0.12176	0.99601	13	0.12579	0.49301	0.98556	14	0.029025	0.0499	0.81038
Complement and coagulation cascades	42	0.31989	0.001996	0.058683	0.68011	1	1	0.092815	0.20758	0.99601	29	0.082222	0.1477	0.98353	13	0.11645	0.50898	0.998
Cortisol synthesis and secretion	28	0.41645	0.08982	0.46541	0.58355	0.91218	1	0.20795	0.95609	0.99601	16	0.16075	0.70459	0.98556	12	0.27088	0.96806	0.998
Cysteine and methionine metabolism	40	0.68368	0.99002	0.99881	0.31632	0.011976	0.46946	0.075739	0.081836	0.92216	12	0.071819	0.23952	0.98556	28	0.077419	0.13174	0.89343
Cytokine-cytokine receptor interaction	39	0.25074	0.001996	0.058683	0.74926	1	1	0.13306	0.56687	0.99601	29	0.08184	0.1477	0.98353	10	0.28158	0.96806	0.998
Cytosolic DNA-sensing pathway	27	0.52774	0.53493	0.86463	0.47226	0.46707	1	0.18524	0.87824	0.99601	13	0.21151	0.87425	0.98556	14	0.16084	0.73653	0.998
D-Glutamine and D-glutamate metabolism	4	0.87491	0.92216	0.99881	0.12509	0.07984	0.73353	0.25018	0.8483	0.99601	0	NA	NA	NA	4	0.25018	0.87824	0.998
ECM-receptor interaction	35	0.35309	0.027944	0.29341	0.64691	0.97405	1	0.052577	0.025948	0.63573	23	0.055572	0.053892	0.73975	12	0.046835	0.12375	0.89343
ErbB signaling pathway	56	0.5003	0.37924	0.81096	0.4997	0.62275	1	0.17894	0.97006	0.99601	29	0.20783	0.95609	0.98556	27	0.14791	0.72056	0.998
Estrogen signaling pathway	61	0.49973	0.37325	0.81096	0.50027	0.62874	1	0.15022	0.8024	0.99601	30	0.13551	0.57685	0.98556	31	0.16445	0.8024	0.998
Ether lipid metabolism	20	0.61985	0.80439	0.98538	0.38015	0.1976	1	0.16875	0.79242	0.99601	7	0.15491	0.63872	0.98556	13	0.17619	0.77844	0.998
Fatty acid biosynthesis	8	0.61005	0.72854	0.95621	0.38995	0.27345	1	0.042809	0.17365	0.99601	3	0.017225	0.28543	0.98556	5	0.05816	0.36727	0.998
Fatty acid degradation	32	0.6842	0.98204	0.99881	0.3158	0.01996	0.48902	0.087036	0.17764	0.99601	10	0.12871	0.54691	0.98556	22	0.068094	0.11377	0.89343
Fatty acid elongation	21	0.39547	0.1018	0.4988	0.60453	0.9002	1	0.085275	0.21357	0.99601	13	0.092331	0.31337	0.98556	8	0.073811	0.31537	0.998
Fc epsilon RI signaling pathway	32	0.5817	0.7984	0.98538	0.4183	0.20359	1	0.19038	0.90419	0.99601	14	0.26146	0.95808	0.98556	18	0.1351	0.53693	0.998
Fc gamma R-mediated phagocytosis	55	0.4869	0.31337	0.80817	0.5131	0.68862	1	0.10396	0.23353	0.99601	28	0.094227	0.24551	0.98556	27	0.11406	0.42715	0.998
Folate biosynthesis	15	0.42622	0.25549	0.73641	0.57378	0.74651	1	0.076292	0.1976	0.99601	9	0.10728	0.41717	0.98556	6	0.029806	0.18762	0.998
FoxO signaling pathway	73	0.50888	0.39521	0.81096	0.49112	0.60679	1	0.10919	0.29341	0.99601	36	0.11482	0.37126	0.98556	37	0.10371	0.26747	0.998
Fructose and mannose metabolism	25	0.55513	0.66267	0.94215	0.44487	0.33932	1	0.19007	0.90818	0.99601	11	0.20493	0.85429	0.98556	14	0.1784	0.82635	0.998
Galactose metabolism	18	0.33636	0.065868	0.39904	0.66364	0.93613	1	0.011028	0.007984	0.39122	12	0.012814	0.011976	0.58283	6	0.0074557	0.057884	0.81038
Glucagon signaling pathway	60	0.51351	0.45509	0.82368	0.48649	0.54691	1	0.11144	0.31337	0.99601	28	0.076914	0.13373	0.98353	32	0.14165	0.66267	0.998
Glutathione metabolism	38	0.59017	0.83433	0.99881	0.40983	0.16766	0.91284	0.10328	0.31337	0.99601	16	0.1493	0.65868	0.98556	22	0.069805	0.12575	0.89343
Glycerolipid metabolism	36	0.37486	0.033932	0.33253	0.62514	0.96806	1	0.16324	0.82435	0.99601	24	0.18472	0.86427	0.98556	12	0.12028	0.51497	0.998
Glycerophospholipid metabolism	50	0.42105	0.071856	0.40626	0.57895	0.93014	1	0.20549	0.98004	0.99601	29	0.17895	0.88623	0.98556	21	0.24213	0.97006	0.998
Glycine, serine and threonine metabolism	31	0.6967	0.97605	0.99881	0.3033	0.025948	0.54491	0.12533	0.51697	0.99601	10	0.25404	0.93812	0.98556	21	0.06404	0.11976	0.89343
Glycolysis / Gluconeogenesis	39	0.59571	0.86228	0.99881	0.40429	0.13972	0.85579	0.17519	0.88623	0.99601	17	0.27346	0.98603	0.98603	22	0.099259	0.33533	0.998
Glycosaminoglycan degradation	11	0.68252	0.86228	0.99881	0.31748	0.13972	0.85579	0.092925	0.36727	0.99601	3	0.0062713	0.17365	0.98556	8	0.12542	0.53293	0.998
Glycosylphosphatidylinositol (GPI)-anchor biosynthesis	13	0.49505	0.42116	0.82368	0.50495	0.58084	1	0.24609	0.94012	0.99601	6	0.17254	0.67864	0.98556	7	0.30914	0.96008	0.998
Glyoxylate and dicarboxylate metabolism	25	0.53669	0.58882	0.8832	0.46331	0.41317	1	0.074452	0.1517	0.99601	12	0.11233	0.47904	0.98556	13	0.039486	0.075848	0.81038
GnRH signaling pathway	46	0.48863	0.32535	0.81096	0.51137	0.67665	1	0.18876	0.93014	0.99601	24	0.20076	0.92016	0.98556	22	0.17566	0.82236	0.998
HIF-1 signaling pathway	59	0.46289	0.16567	0.64088	0.53711	0.83633	1	0.14455	0.69661	0.99601	32	0.14296	0.67465	0.98556	27	0.14644	0.70459	0.998
Hedgehog signaling pathway	25	0.44362	0.2016	0.70544	0.55638	0.8004	1	0.16679	0.80439	0.99601	14	0.15539	0.7006	0.98556	11	0.1813	0.82435	0.998
Hematopoietic cell lineage	18	0.43747	0.24551	0.73641	0.56253	0.75649	1	0.048936	0.087824	0.92216	10	0.031484	0.071856	0.74936	8	0.070752	0.30339	0.998
Hippo signaling pathway	71	0.47686	0.22555	0.70544	0.52314	0.77645	1	0.10826	0.27146	0.99601	38	0.12369	0.53493	0.98556	33	0.090503	0.22954	0.998
Histidine metabolism	13	0.68718	0.88623	0.99881	0.31282	0.11577	0.85579	0.14636	0.64271	0.99601	5	0.37694	0.97206	0.98556	8	0.0022413	0.011976	0.81038
IL-17 signaling pathway	45	0.43671	0.11577	0.50532	0.56329	0.88623	1	0.18971	0.95808	0.99601	27	0.21928	0.96008	0.98556	18	0.14537	0.60479	0.998
Inositol phosphate metabolism	49	0.54785	0.68463	0.94215	0.45215	0.31737	1	0.15894	0.81437	0.99601	21	0.13041	0.5509	0.98556	28	0.18034	0.8982	0.998
Insulin secretion	28	0.37102	0.03992	0.34519	0.62898	0.96208	1	0.15379	0.73453	0.99601	18	0.1412	0.58483	0.98556	10	0.17646	0.76447	0.998
Insulin signaling pathway	90	0.43954	0.05988	0.39904	0.56046	0.94212	1	0.13397	0.62076	0.99601	49	0.093629	0.1477	0.98353	41	0.18219	0.92814	0.998
Intestinal immune network for IgA production	5	0.20059	0.051896	0.39122	0.79941	0.9501	1	0.0013924	0.037924	0.65203	4	0.0016048	0.05988	0.73975	1	0.00054299	0.42116	0.998
Leukocyte transendothelial migration	48	0.52816	0.55289	0.86463	0.47184	0.4491	1	0.17159	0.9002	0.99601	22	0.15773	0.73852	0.98556	26	0.18332	0.87226	0.998
Linoleic acid metabolism	3	0.57538	0.49701	0.85953	0.42462	0.50499	1	0.19492	0.68064	0.99601	1	0.018523	0.55489	0.98556	2	0.28312	0.81437	0.998
Longevity regulating pathway	71	0.41475	0.023952	0.27084	0.58525	0.97804	1	0.1489	0.77046	0.99601	41	0.11544	0.37725	0.98556	30	0.19462	0.94611	0.998
Lysine degradation	47	0.63399	0.95409	0.99881	0.36601	0.047904	0.69352	0.099075	0.19561	0.99601	18	0.17366	0.77246	0.98556	29	0.052779	0.03992	0.81038
MAPK signaling pathway	139	0.54245	0.72056	0.95425	0.45755	0.28144	1	0.16106	0.97405	0.99601	62	0.15474	0.80439	0.98556	77	0.16615	0.92615	0.998
Mannose type O-glycan biosynthesis	11	0.60487	0.72056	0.95425	0.39513	0.28144	1	0.11424	0.501	0.99601	4	0.07047	0.41517	0.98556	7	0.13924	0.60279	0.998
Melanogenesis	35	0.48037	0.33134	0.81096	0.51963	0.67066	1	0.10567	0.30938	0.99601	18	0.092353	0.26547	0.98556	17	0.11977	0.48104	0.998
Metabolism of xenobiotics by cytochrome P450	26	0.55666	0.69261	0.94215	0.44334	0.30938	1	0.19948	0.94411	0.99601	12	0.25553	0.96208	0.98556	14	0.15144	0.69261	0.998
Mucin type O-glycan biosynthesis	15	0.34162	0.087824	0.46541	0.65838	0.91417	1	0.047619	0.06986	0.90469	10	0.048149	0.1497	0.98353	5	0.04656	0.33733	0.998
N-Glycan biosynthesis	40	0.27972	0.001996	0.058683	0.72028	1	1	0.073522	0.073852	0.90469	29	0.057211	0.051896	0.73975	11	0.11653	0.56088	0.998
NF-kappa B signaling pathway	42	0.53729	0.57685	0.8832	0.46271	0.42515	1	0.13596	0.58882	0.99601	19	0.12744	0.52695	0.98556	23	0.143	0.67066	0.998
NOD-like receptor signaling pathway	90	0.46751	0.15369	0.61062	0.53249	0.8483	1	0.17467	0.98204	0.99601	47	0.14756	0.73852	0.98556	43	0.20429	0.97206	0.998
Natural killer cell mediated cytotoxicity	45	0.4305	0.091816	0.46541	0.5695	0.91018	1	0.15724	0.82036	0.99601	26	0.1504	0.73852	0.98556	19	0.1666	0.78842	0.998
Neomycin, kanamycin and gentamicin biosynthesis	2	0.49999	0.46108	0.82368	0.50001	0.54092	1	1.4756e-05	0.053892	0.79222	1	6.331e-08	0.031936	0.73975	1	2.9449e-05	0.21756	0.998
Neuroactive ligand-receptor interaction	23	0.30919	0.007984	0.14671	0.69081	0.99401	1	0.16241	0.77445	0.99601	16	0.12369	0.49102	0.98556	7	0.25091	0.88024	0.998
Nicotinate and nicotinamide metabolism	20	0.57585	0.69062	0.94215	0.42415	0.31138	1	0.085256	0.26946	0.99601	8	0.046189	0.16168	0.98353	12	0.1113	0.45509	0.998
Nitrogen metabolism	9	0.77762	0.96407	0.99881	0.22238	0.037924	0.69352	0.2195	0.89022	0.99601	2	0.49318	0.96208	0.98556	7	0.1413	0.60679	0.998
Notch signaling pathway	29	0.56979	0.74451	0.95798	0.43021	0.25749	1	0.057059	0.03992	0.65203	12	0.029278	0.061876	0.73975	17	0.076669	0.18962	0.998
One carbon pool by folate	17	0.65572	0.88024	0.99881	0.34428	0.12176	0.85579	0.17538	0.81437	0.99601	5	0.12758	0.56687	0.98556	12	0.19529	0.83034	0.998
Other glycan degradation	14	0.47037	0.3513	0.81096	0.52963	0.6507	1	0.2021	0.86826	0.99601	7	0.14283	0.6008	0.98556	7	0.26137	0.90419	0.998
Other types of O-glycan biosynthesis	15	0.63795	0.87226	0.99881	0.36205	0.12974	0.85579	0.058674	0.10379	0.95359	5	0.0018625	0.031936	0.73975	10	0.08708	0.35729	0.998
Ovarian steroidogenesis	15	0.24347	0.007984	0.14671	0.75653	0.99401	1	0.21255	0.89022	0.99601	11	0.11329	0.44112	0.98556	4	0.48552	0.99401	0.998
Oxidative phosphorylation	101	0.35377	0.001996	0.058683	0.64623	1	1	0.11674	0.32735	0.99601	67	0.11383	0.32535	0.98556	34	0.12248	0.47705	0.998
Oxytocin signaling pathway	66	0.472	0.22555	0.70544	0.528	0.77645	1	0.14837	0.77445	0.99601	35	0.14423	0.7006	0.98556	31	0.15305	0.73653	0.998
PI3K-Akt signaling pathway	151	0.4595	0.053892	0.39122	0.5405	0.9481	1	0.13968	0.75848	0.99601	85	0.16388	0.88423	0.98556	66	0.10851	0.26547	0.998
PPAR signaling pathway	42	0.55559	0.69062	0.94215	0.44441	0.31138	1	0.049138	0.011976	0.44012	18	0.02038	0.00998	0.58283	24	0.070707	0.14172	0.89343
Pantothenate and CoA biosynthesis	16	0.45784	0.32934	0.81096	0.54216	0.67265	1	0.049737	0.1018	0.95359	9	0.080369	0.28343	0.98556	7	0.010354	0.067864	0.81038
Parathyroid hormone synthesis, secretion and action	54	0.56314	0.76048	0.95798	0.43686	0.24152	1	0.1812	0.93413	0.99601	24	0.22092	0.9481	0.98556	30	0.14942	0.73253	0.998
Pentose and glucuronate interconversions	14	0.47148	0.35329	0.81096	0.52852	0.6487	1	0.12328	0.5489	0.99601	8	0.18295	0.75649	0.98556	6	0.043715	0.25948	0.998
Pentose phosphate pathway	21	0.45872	0.26946	0.76175	0.54128	0.73253	1	0.13292	0.5489	0.99601	11	0.09353	0.34132	0.98556	10	0.17624	0.76248	0.998
Phenylalanine metabolism	8	0.17529	0.017964	0.24451	0.82471	0.98403	1	0.10058	0.41317	0.99601	7	0.11495	0.47904	0.98556	1	4.7954e-06	0.14172	0.89343
Phenylalanine, tyrosine and tryptophan biosynthesis	3	0.002519	0.01996	0.24451	0.99748	0.98204	1	0.0050379	0.18762	0.99601	3	0.0050379	0.15768	0.98353	0	NA	NA	NA
Phosphatidylinositol signaling system	63	0.48511	0.27944	0.76613	0.51489	0.72255	1	0.15961	0.8523	0.99601	31	0.1158	0.38523	0.98556	32	0.20206	0.95609	0.998
Phospholipase D signaling pathway	67	0.4173	0.01996	0.24451	0.5827	0.98204	1	0.17425	0.9501	0.99601	40	0.16991	0.87226	0.98556	27	0.18069	0.88822	0.998
Phosphonate and phosphinate metabolism	5	0.80868	0.92814	0.99881	0.19132	0.073852	0.73353	0.15372	0.64471	0.99601	1	0.4277	0.86028	0.98556	4	0.085224	0.49701	0.998
Platelet activation	63	0.4695	0.1996	0.70544	0.5305	0.8024	1	0.16177	0.86826	0.99601	34	0.1669	0.80639	0.98556	29	0.15576	0.78643	0.998
Porphyrin and chlorophyll metabolism	23	0.66637	0.94411	0.99881	0.33363	0.057884	0.69968	0.14107	0.62675	0.99601	8	0.24362	0.90818	0.98556	15	0.086383	0.28942	0.998
Primary bile acid biosynthesis	9	0.46	0.36926	0.81096	0.54	0.63273	1	0.21665	0.88423	0.99601	4	0.028727	0.24351	0.98556	5	0.36698	0.97605	0.998
Progesterone-mediated oocyte maturation	57	0.50346	0.41317	0.82076	0.49654	0.58882	1	0.21373	0.99601	0.99601	28	0.20673	0.95409	0.98556	29	0.22049	0.97405	0.998
Prolactin signaling pathway	33	0.52337	0.51697	0.86357	0.47663	0.48503	1	0.18548	0.91018	0.99601	17	0.25481	0.97006	0.98556	16	0.11182	0.45709	0.998
Propanoate metabolism	27	0.70491	0.98802	0.99881	0.29509	0.013972	0.46946	0.12557	0.54691	0.99601	8	0.21596	0.84032	0.98556	19	0.087514	0.27146	0.998
Purine metabolism	73	0.52597	0.52894	0.86463	0.47403	0.47305	1	0.14633	0.75848	0.99601	33	0.11325	0.38124	0.98556	40	0.17362	0.91218	0.998
Pyrimidine metabolism	41	0.6007	0.88224	0.99881	0.3993	0.11976	0.85579	0.098563	0.28144	0.99601	15	0.043276	0.057884	0.73975	26	0.13046	0.56886	0.998
Pyruvate metabolism	29	0.60782	0.86427	0.99881	0.39218	0.13772	0.85579	0.098499	0.26347	0.99601	12	0.17125	0.76447	0.98556	17	0.047143	0.083832	0.81038
RIG-I-like receptor signaling pathway	34	0.46245	0.21956	0.70544	0.53755	0.78244	1	0.10546	0.32735	0.99601	19	0.13243	0.56088	0.98556	15	0.071298	0.21357	0.998
Rap1 signaling pathway	93	0.51617	0.45509	0.82368	0.48383	0.54691	1	0.15459	0.86028	0.99601	47	0.19557	0.96607	0.98556	46	0.11271	0.36527	0.998
Ras signaling pathway	92	0.52144	0.54491	0.86463	0.47856	0.45709	1	0.14651	0.77645	0.99601	45	0.17138	0.87026	0.98556	47	0.12271	0.47106	0.998
Regulation of lipolysis in adipocytes	21	0.36418	0.053892	0.39122	0.63582	0.9481	1	0.20287	0.9002	0.99601	13	0.13676	0.57086	0.98556	8	0.3103	0.97206	0.998
Relaxin signaling pathway	63	0.50853	0.44311	0.82368	0.49147	0.55888	1	0.18216	0.96208	0.99601	31	0.1863	0.89222	0.98556	32	0.17815	0.88423	0.998
Renin secretion	25	0.57154	0.7485	0.95798	0.42846	0.25349	1	0.18553	0.89222	0.99601	10	0.16077	0.6986	0.98556	15	0.20204	0.88024	0.998
Renin-angiotensin system	9	0.5353	0.5509	0.86463	0.4647	0.4511	1	0.061883	0.23553	0.99601	4	0.024053	0.22555	0.98556	5	0.092147	0.48703	0.998
Retinol metabolism	15	0.64886	0.9022	0.99881	0.35114	0.0998	0.85579	0.1711	0.74251	0.99601	5	0.20324	0.77645	0.98556	10	0.15503	0.70259	0.998
Riboflavin metabolism	7	0.56286	0.59481	0.8832	0.43714	0.40719	1	0.030107	0.1497	0.99601	3	0.015142	0.26547	0.98556	4	0.041331	0.37325	0.998
Selenocompound metabolism	13	0.50307	0.45509	0.82368	0.49693	0.54691	1	0.10123	0.40319	0.99601	7	0.17113	0.71257	0.98556	6	0.019677	0.13573	0.89343
Sphingolipid metabolism	30	0.51297	0.50499	0.86318	0.48703	0.49701	1	0.24086	0.99202	0.99601	12	0.083489	0.31337	0.98556	18	0.34577	0.998	0.998
Sphingolipid signaling pathway	78	0.50208	0.36727	0.81096	0.49792	0.63473	1	0.18216	0.97804	0.99601	37	0.14234	0.64072	0.98556	41	0.2181	0.98603	0.998
Starch and sucrose metabolism	20	0.51496	0.47505	0.83134	0.48504	0.52695	1	0.15111	0.71457	0.99601	10	0.18103	0.79441	0.98556	10	0.1212	0.53293	0.998
Steroid biosynthesis	15	0.56543	0.69461	0.94215	0.43457	0.30739	1	0.066077	0.1477	0.99601	7	0.13957	0.6008	0.98556	8	0.0017704	0.00998	0.81038
Steroid hormone biosynthesis	16	0.54026	0.58683	0.8832	0.45974	0.41517	1	0.23415	0.96208	0.99601	7	0.21676	0.83633	0.98556	9	0.24768	0.92216	0.998
Sulfur metabolism	8	0.44138	0.36128	0.81096	0.55862	0.64072	1	0.13879	0.57485	0.99601	5	0.21724	0.81437	0.98556	3	0.0080293	0.21158	0.998
Synthesis and degradation of ketone bodies	8	0.74791	0.92216	0.99881	0.25209	0.07984	0.73353	0.0051766	0.017964	0.52814	2	0.0019902	0.23752	0.98556	6	0.0062388	0.047904	0.81038
T cell receptor signaling pathway	53	0.48509	0.29741	0.78069	0.51491	0.70459	1	0.19161	0.97206	0.99601	27	0.17732	0.8483	0.98556	26	0.20645	0.93413	0.998
TGF-beta signaling pathway	48	0.54164	0.62076	0.90348	0.45836	0.38124	1	0.16204	0.83034	0.99601	21	0.13751	0.60679	0.98556	27	0.18111	0.88822	0.998
TNF signaling pathway	61	0.4823	0.25549	0.73641	0.5177	0.74651	1	0.20846	0.99002	0.99601	31	0.1864	0.89222	0.98556	30	0.23127	0.98603	0.998
Taurine and hypotaurine metabolism	4	0.17172	0.065868	0.39904	0.82828	0.93613	1	0.15671	0.64471	0.99601	3	0.00010153	0.021956	0.73975	1	0.62652	0.92016	0.998
Terpenoid backbone biosynthesis	21	0.62089	0.83433	0.99881	0.37911	0.16766	0.91284	0.17007	0.78244	0.99601	7	0.11777	0.49701	0.98556	14	0.19621	0.87425	0.998
Th1 and Th2 cell differentiation	36	0.48014	0.29541	0.78069	0.51986	0.70659	1	0.21894	0.98403	0.99601	19	0.22242	0.93214	0.98556	17	0.21506	0.94411	0.998
Th17 cell differentiation	47	0.47077	0.2475	0.73641	0.52923	0.75449	1	0.16309	0.81238	0.99601	26	0.19072	0.9022	0.98556	21	0.12888	0.54092	0.998
Thermogenesis	166	0.45903	0.03992	0.34519	0.54097	0.96208	1	0.12496	0.46108	0.99601	90	0.11746	0.36727	0.98556	76	0.13385	0.63074	0.998
Thiamine metabolism	9	0.64124	0.76248	0.95798	0.35876	0.23952	1	0.051368	0.18563	0.99601	3	0.00078434	0.063872	0.73975	6	0.076659	0.38523	0.998
Thyroid hormone signaling pathway	74	0.5472	0.6986	0.94215	0.4528	0.30339	1	0.10187	0.18363	0.99601	33	0.098844	0.26347	0.98556	41	0.1043	0.30739	0.998
Thyroid hormone synthesis	36	0.52233	0.51297	0.86357	0.47767	0.48902	1	0.14089	0.65469	0.99601	17	0.13764	0.60679	0.98556	19	0.1438	0.7006	0.998
Toll-like receptor signaling pathway	45	0.49032	0.35329	0.81096	0.50968	0.6487	1	0.21965	0.99202	0.99601	24	0.25027	0.98403	0.98603	21	0.18466	0.84431	0.998
Tryptophan metabolism	28	0.58077	0.75649	0.95798	0.41923	0.24551	1	0.11469	0.41717	0.99601	12	0.15559	0.69261	0.98556	16	0.084007	0.25549	0.998
Tyrosine metabolism	15	0.36316	0.12176	0.50532	0.63684	0.88024	1	0.22568	0.92016	0.99601	10	0.214	0.88822	0.98556	5	0.24904	0.89621	0.998
Ubiquinone and other terpenoid-quinone biosynthesis	9	0.32591	0.12176	0.50532	0.67409	0.88024	1	0.040474	0.14172	0.99601	6	0.019215	0.14371	0.98353	3	0.082991	0.50699	0.998
VEGF signaling pathway	33	0.47039	0.28144	0.76613	0.52961	0.72056	1	0.17603	0.86826	0.99601	17	0.14278	0.63872	0.98556	16	0.21136	0.9022	0.998
Valine, leucine and isoleucine degradation	45	0.70855	0.99202	0.99881	0.29145	0.00998	0.46946	0.14284	0.68263	0.99601	12	0.17491	0.77645	0.98556	33	0.13118	0.57485	0.998
Vitamin B6 metabolism	5	0.62055	0.69461	0.94215	0.37945	0.30739	1	0.041203	0.2495	0.99601	2	0.10287	0.64671	0.98556	3	8.8246e-05	0.027944	0.81038
Wnt signaling pathway	64	0.45136	0.11976	0.50532	0.54864	0.88224	1	0.14763	0.75848	0.99601	35	0.13174	0.55888	0.98556	29	0.16681	0.8523	0.998
alpha-Linolenic acid metabolism	5	0.73784	0.83633	0.99881	0.26216	0.16567	0.91284	0.13709	0.58683	0.99601	1	0.031914	0.59681	0.98556	4	0.16339	0.67066	0.998
beta-Alanine metabolism	19	0.74323	0.98603	0.99881	0.25677	0.015968	0.46946	0.071329	0.15369	0.99601	5	0.15981	0.64671	0.98556	14	0.039727	0.083832	0.81038
cAMP signaling pathway	80	0.50433	0.38723	0.81096	0.49567	0.61477	1	0.13755	0.63673	0.99601	39	0.12432	0.4511	0.98556	41	0.15014	0.77046	0.998
cGMP-PKG signaling pathway	73	0.47406	0.17964	0.67711	0.52594	0.82236	1	0.1418	0.70659	0.99601	37	0.10223	0.23154	0.98556	36	0.18248	0.93214	0.998
mTOR signaling pathway	93	0.40438	0.005988	0.14671	0.59562	0.99601	1	0.13089	0.56886	0.99601	56	0.11954	0.39521	0.98556	37	0.14807	0.71457	0.998
