# Supplementary material for: Multi-omics insights into host-viral response and pathogenesis in Crimean-Congo hemorrhagic fever viruses for novel therapeutic target
Source: eLife. 2022 Apr 19;11:e76071. doi: 10.7554/eLife.76071 (PMC9018070; doi:10.7554/eLife.76071)
Supplement: Table 1—source data 1. — The symptoms onset and sampling time are marked. [file elife-76071-table1-data1.xlsx]

## Sheet: Sayfa1
Source Data 1. The CCHF patient characteristics (N = 18)
PID/Age(y)/Gender	The date of symptoms onset	The date of hospitalisation							SGS scoring during hospitalization days										Second sampling (weeks)	Severity group*	RT-PCR	CT-values	Anti-CCHFV IgM	Outcome
P01/33/Female	2017-05-30	2017-06-03							5	5	3	2	2						55	1	positive	31.85	ND	Survived
P02/18/Male	2017-06-06	2017-06-12							7	6	4	3	2						ND	2	positive	25.89	positive	Survived
P03/45/Male	2017-06-12	2017-06-13							0	0	2	2	3	5	4	3	2		54	1	positive	21.87	ND	Survived
P04/67/Male	2017-06-13	2017-06-16							8	8	8	7	6	4	4				54	2	positive	22.38	ND	Survived
P05/48/Male	2017-06-12	2017-06-18							7	7	4	4							57	2	positive	29.79	ND	Survived
P06/68/Male	2017-06-13	2017-06-19							5	3	2	2							55	1	positive	28.41	ND	Survived
P07/77/Male	2017-06-19	2017-06-22							6	6	4	5	6	6	4	4	3		54	2	positive	24.77	ND	Survived
P08/29/Female	2017-06-20	2017-06-24							6	5	4	4	3	2	2				53	2	positive	26.91	ND	Survived
P09/50/Female	2017-06-20	2017-06-25							4	3	2	1							53	1	positive	26.36	positive	Survived
P10/35/Female	2017-07-07	2017-07-12							3	4	4	3	4	3	2	2	2		51	1	negative	NA	positive	Survived
P11/64/Female	2017-07-15	2017-07-18							10	10	11	9	8	5	5	4	4	3	ND	2	positive	22.46	ND	Survived
P12/57/Male	2017-07-16	2017-07-21							9	9	9	9	8	7	6	5	4		50	2	positive	20.81	ND	Survived
P13/79/Male	2017-07-22	2017-07-24							11	12									NA	3	positive	22	ND	Died
P14/36/Male	2017-08-01	2017-08-06							7	5	4	4	3	2	1				47	2	positive	24.66	ND	Survived
P15/62/Male	2017-08-15	2017-08-20							9	8	7	7	7	7	6	5	5		46	2	positive	19.86	ND	Survived
P16/48/Male	2017-09-05	2017-09-07							4	4	1	3	3	3	3	2			ND	1	positive	22.09	ND	Survived
P17/55/Male	2018-04-12	2018-04-17							9	7	6	5	5	5	4	3	1		ND	2	positive	26.16	ND	Survived
P18/44/Female	2018-04-23	2018-04-27							9	10	10	9	8	8	8	7	6	5	ND	2	positive	21.27	ND	Survived
			-6	-5	-4	-3	-2	-1	0	1	2	3	4	5	6	7	8	9
			Days from symptoms onset						Days from enrollment
* 1: Low (0-5); 2: Intermediate (6-10); 3: High (11-16)
ND: not determined; NA: not aplicable; SGS: severity grading system; RT-PCR: real time - polymerase chain reaction; CT values: cycle threshold values; CCHFV: Crimean-Congo haemorrhagic fever virus. The swimmer plot depicting SGS dynamics for CCHF patients who were admitted to hospital. Symptom onset and prehospitalization are indicated by black lines with arrowhead. SGS is calculated by daily int…
